# Supplementary material for: Adapting mark-recapture methods to estimating accepted species-level diversity: a case study with terrestrial Gastropoda
Source: PeerJ. 2022 Jun 21;10:e13139. doi: 10.7717/peerj.13139 (PMC9231345; doi:10.7717/peerj.13139)
Supplement: Supplemental Information 2 — Each line represents one species of land snail regarded as valid in the ANSP collection in August 2021. The family assignment at ANSP and the random number assigned to each name are also shown. [file peerj-10-13139-s002.xlsx]

## Sheet: Names
Random	Full name	Family	Lots
7.08701e-06	Pupinella (Pupinopsis) rufa	Pupinidae	75
1.80374e-05	Paramiella incisa	Neocyclotidae	4
2.74604e-05	Kaliella indifferens	Helicarionidae	1
6.42066e-05	Tacheopsis nicaeensis	Helicidae	1
9.05581e-05	Leucozonella (Narinula) hypophaea	Hygromiidae	1
0.000103078	Testacella haliotoides	Testacellidae	10
0.000173907	Bradybaena graminum	Bradybaenidae	1
0.000278744	Lobosculum plicata	Polygyridae	53
0.000292071	Allocharopa tarravillensis	Charopidae	1
0.000334689	Pilorcula raymondi	Orculidae	6
0.000411628	Diplommatina (Sinica) canarica	Diplommatinidae	1
0.000512303	Cerion russelli	Cerionidae	5
0.000554923	Montenegrina umbilicata	Clausiliidae	2
0.000631734	Xerarionta pandorae	XantHonycidae	18
0.000679578	Lucidella (Poenia) pilsbryi	Helicinidae	5
0.000787635	Gastrocopta munita	Vertiginidae	20
0.000830937	Stephanoda lirata	Charopidae	2
0.000959205	Ovachlamys fulgidus	Helicarionidae	5
0.00118763	Pythia ceylanica	Ellobiidae	7
0.00122575	Phaedusa hainanensis	Clausiliidae	1
0.00137658	Spirostoma japonicum	Cyclophoridae	37
0.0015897	Euhadra amaliae	Bradybaenidae	97
0.00171312	Pseudoglessula boivini	Subulinidae	4
0.00190682	Alycaeus (Alycaeus) reinhardi	Cyclophoridae	2
0.00193094	Hemicycla psathrya	Helicidae	1
0.00199904	Phrixgnathus sciadium	Punctidae	2
0.00201181	Chondropomorus dentatus	Annulariidae	74
0.00205271	Rhinus ciliatus	Bulimulidae	1
0.00205304	Brachypodella (Brevipedella) imitatrix	Urocoptidae	2
0.00207527	Achatinella (Achatinellastrum) buddii	Achatinellidae	21
0.00213917	Tropidophora madagascariensis	Pomatiidae	2
0.00219403	Cerion curtissi	Cerionidae	6
0.00230431	Cyclotus pruinosus	Cyclophoridae	3
0.00240338	Balambania meridionalis	Assimineidae	1
0.00265828	Naesiotus unifasciatus	Bulimulidae	2
0.00271508	Satsuma textilis	Camaenidae	3
0.00273369	Diaphera dicraspedia	Streptaxidae	1
0.00276266	Cecilioides aegyptiaca	Ferussaciidae	1
0.00294154	Luchuphaedusa jayi	Clausiliidae	4
0.00297838	Succinea bogotensis	Succineidae	1
0.00300034	Drymaeus multifasciatus	Bulimulidae	6
0.00304819	Cerion pepperi	Cerionidae	6
0.00305066	Laoma pirongiaensis	Punctidae	2
0.00324877	Odontosagda abbotti	Sagdidae	1
0.00346826	Tortulosa aurea	Pupinidae	2
0.00351527	Euplecta scobinoides	Ariophantidae	1
0.00352702	Amastra subobscura	Amastridae	1
0.00364693	Protobeliscus latispira	Subulinidae	1
0.00375685	Papillifera agrigentina	Clausiliidae	2
0.00376472	Ptychodon varicosa	Charopidae	6
0.00378112	Pachystyla mauritianella	Helicarionidae	3
0.0038926	Ibycus hiraseanus	Ariophantidae	2
0.00390245	Thaumastus hartwegi	Bulimulidae	2
0.0039316	Placostylus (Proaspastus) phenax	Bulimulidae	1
0.00395009	Trachycystis burnupi	Charopidae	1
0.00409669	Graciliaria caucasica	Clausiliidae	1
0.00410615	Japonia (Japonia) barbata	Cyclophoridae	3
0.00423102	Opisthosiphon vaughani	Annulariidae	2
0.00429676	Trochochlamys sorocula	Chronidae	1
0.00443116	Succinea putris	Succineidae	66
0.00445214	Helicella zaraensis	Hygromiidae	1
0.00449288	Ampelita (Xystera) hemioxia	Acavidae	4
0.00453079	Zachrysia trinitaria	Pleurodontidae	25
0.00466553	Mauronapaeus jeannoti	Enidae	1
0.00475914	Amphicyclotus ponderosus	Neocyclotidae	3
0.00479463	Discartemon roebeleni	Streptaxidae	1
0.00493106	Fadyenia fischeriana	Helicinidae	14
0.00494449	Tropidauchenia perdisi	Clausiliidae	1
0.00506483	Pupisoma circumlitum	Valloniidae	1
0.00514572	Tortaxis excellens	Subulinidae	1
0.00520082	Holcauchen miranda	Enidae	1
0.00520632	Nesiohelix irrediviva	Bradybaenidae	5
0.00522114	Sairostoma perplexum	Streptaxidae	1
0.00528085	Annularisca auricoma	Annulariidae	9
0.00533213	Euhadra orientalis	Bradybaenidae	6
0.00543272	Clausilia abyssoclista	Clausiliidae	1
0.00562244	Poteria bakeri	Neocyclotidae	1
0.0056293	Quadriplicata quadriplicata	Clausiliidae	1
0.00566509	Vertigo sieversi	Vertiginidae	3
0.00573769	Succinea (Novisuccinea) solastra	Succineidae	4
0.00583389	Paravitrea tiara	Pristilomatidae	1
0.00587177	Tacheocampylaea (Mesodontopsis) chaixi	Helicidae	1
0.00588331	Parachondrodes nigriculus	Annulariidae	2
0.00589346	Massylaea massylaeus	Helicidae	6
0.00589855	Lyropupa (Mirapupa) thaumasia	Vertiginidae	7
0.00599568	Thaumastus (Quechua) conspicuus	Bulimulidae	5
0.00602697	Tornatellides subperforatus	Achatinellidae	2
0.00625207	Pupilla cupa	Pupillidae	3
0.00627732	Coelostemma marrsi	Urocoptidae	1
0.00643537	Coryda nigropicta	Helminthoglyptidae	1
0.00651242	Diaphera sericina	Streptaxidae	3
0.00653859	Coryda (Cysticopsis) hjalmarsoni	Helminthoglyptidae	2
0.00657605	Cochlicopa lubrica	Cochlicopidae	479
0.00664712	Tomelasmus irroratus	Urocoptidae	22
0.00669371	Macrochlamys causia	Ariophantidae	1
0.0068726	Fijia trisoriensis	Helicarionidae	1
0.00710006	Sphincterochila (Albea) syrosina	Helicidae	1
0.00727953	Vertigo gouldi	Vertiginidae	134
0.00728493	Alycaeus (Dicharax) odontophorus	Cyclophoridae	1
0.00729121	Hemiphaedusa similaris	Clausiliidae	1
0.00732365	Cyclopilsbrya hendersoni	Neocyclotidae	1
0.0073306	Chondrula quinquedentata	Enidae	8
0.00733482	Polygyra cereolus	Polygyridae	442
0.00734744	Pseudoglessula strigosa	Subulinidae	1
0.00748379	Drymaeus cactivoris	Bulimulidae	4
0.00755709	Rhytida lampra	Rhytididae	3
0.00768341	Obeliscus carphodes	Subulinidae	1
0.0078256	Amastra uniplicata	Amastridae	6
0.00799315	Gonaxis montisnimbae	Streptaxidae	1
0.00811642	Edentiella edentula	Hygromiidae	17
0.00816198	Pupoides nitidulus	Pupillidae	311
0.00821536	Megomphix hemphilli	Ammonitellidae	5
0.00823879	Chondrothyra uniplicata	Annulariidae	2
0.00831158	Sesara infredens	Helicarionidae	5
0.00841152	Centralia obliqua	Urocoptidae	4
0.00841201	Chondrina angulata	Chondrinidae	1
0.00841541	Papuina flexilabris	Camaenidae	4
0.00842264	Diplommatina (Sinica) gotoensis	Diplommatinidae	3
0.00843645	Tropidophora cuvieriana	Pomatiidae	4
0.00866748	Caldwellia cernica	Helicarionidae	2
0.0087436	Strobilus opeas	Achatinellidae	1
0.00879426	Chaenaxis tuba	Vertiginidae	14
0.00886129	Wilkinsonaea jardineiana	Helicinidae	2
0.00902975	Coryda (Cysticopsis) auberi	Helminthoglyptidae	3
0.00910903	Parakaliella habei	Helicarionidae	2
0.00915376	Armiella ricei	Amastridae	1
0.00924467	Partula mooreana	Partulidae	24
0.0093309	Scutalus sanborni	Bulimulidae	1
0.00956231	Gracilinenia huallagana	Clausiliidae	3
0.0096118	Helicodiscus punctatellus	Helicodiscidae	1
0.00963368	Hypselartemon alveus	Streptaxidae	4
0.0096511	Laeocathaica dolani	Bradybaenidae	2
0.00970511	Boysidia (Paraboysidia) robusta	Hypselostomatidae	1
0.00973776	Spirorbula latens	Helicidae	3
0.0097829	Sagda triptycha	Sagdidae	9
0.00982626	Drymaeus flexuosus	Bulimulidae	4
0.00991967	Leptachatina arborea	Amastridae	2
0.00994157	Albinaria lerosiensis	Clausiliidae	1
0.00997741	Cyclophorus theodorei	Cyclophoridae	4
0.0100677	Laeocathaica filippina	Bradybaenidae	2
0.0101152	Rectartemon wagneri	Streptaxidae	4
0.0102418	Cochlostyla leopardus	Bradybaenidae	4
0.0103119	Gastrocopta duncana	Vertiginidae	3
0.0109181	Sagda foremaniana	Sagdidae	17
0.0110349	Torrecoptis depressicostata	Urocoptidae	2
0.011102	Flavoleacina microlestes	Oleacinidae	1
0.0112179	Cerion hesitata	Cerionidae	1
0.0112579	Polydontes apollo	Pleurodontidae	4
0.0115391	Ptychorhytida testudinaria	Rhytididae	3
0.0116772	Lucerna chemnitziana	Pleurodontidae	49
0.0119562	Isabellaria osculans	Clausiliidae	2
0.0120218	Piena (Haleakala) indefinita	Euconulidae	2
0.0120357	Pseudopomatias himalayanus	Pupinidae	2
0.0120533	Monacha obstructa	Helicidae	8
0.0121207	Elsothera funerea	Charopidae	1
0.012121	Ptychotrema (Adjua) elimensis	Streptaxidae	1
0.0121434	Ancomena alameda	Haplotrematidae	2
0.0121475	Bradybaena luna	Bradybaenidae	2
0.0121625	Microceramus maculatus	Urocoptidae	2
0.0121973	Cathaica phaeozona	Bradybaenidae	2
0.0122891	Zenobiella vicina	Hygromiidae	8
0.0124476	Theobaldius layardi	Cyclophoridae	1
0.0125817	Helicella macta	Hygromiidae	1
0.0127451	Cryptomastix (Bupiogona) hendersoni	Polygyridae	17
0.012883	Euonyma cacuminata	Subulinidae	1
0.0128862	Carelia hyattiana	Amastridae	1
0.0128992	Cerastua somaliensis	Enidae	2
0.0129246	Eurytus episcopalis	Bulimulidae	2
0.0130726	Cochlostoma (Titanopoma) pinteri	Diplommatinidae	1
0.0130967	Dendrotrochus coultasi	Helicarionidae	1
0.0132678	Macrogastra (Pyrostoma) tumida	Clausiliidae	6
0.0132998	Satsuma rugosa	Camaenidae	1
0.0133846	Vallonia albula	Valloniidae	40
0.0136595	Ena obscura	Enidae	49
0.0137305	Epiphragmophora monographa	Epiphragmophoridae	1
0.0139083	Pfeifferia micans	Bradybaenidae	4
0.0139541	Thapsia nemorum	Urocyclidae	1
0.014088	Gouldipoma plicatulum	Annulariidae	14
0.0140931	Streptaxis pfeifferi	Streptaxidae	4
0.0141885	Sulcobasis rohdei	Camaenidae	1
0.0142066	Partula protracta	Partulidae	1
0.0142548	Gonospira mondraini	Streptaxidae	8
0.0143175	Shuttleworthia tryoniana	Oleacinidae	1
0.0143997	Chondrula arctespira	Enidae	1
0.0144346	Subzebrinus ujfalvyanus	Enidae	3
0.0144555	Oxychilus lentiformis	Oxychilidae	1
0.0144695	Phengus opalinus	Bradybaenidae	6
0.0147983	Rhynchotrochus rhynchotus	Camaenidae	1
0.0150322	Auris melastoma	Bulimulidae	4
0.015126	Euconulus nesioticus	Euconulidae	2
0.0152431	Sagda occidentalis	Sagdidae	29
0.0152825	Bradybaena brevispira	Bradybaenidae	2
0.0155686	Helicodiscus shimeki	Helicodiscidae	11
0.0156545	Gulella viae	Streptaxidae	1
0.0157743	Alcadia (Idesa) rotunda	Helicinidae	17
0.0161219	Vitrea sturanyi	Pristilomatidae	2
0.0164255	Cyclophorus (Glossostylus) fulguratus	Cyclophoridae	1
0.0166103	Melaniella acuticostata	Oleacinidae	10
0.0166298	Gulella tsara	Streptaxidae	1
0.0167722	Helicobulinus turbinoides	Bradybaenidae	4
0.0168905	Charopa norfolkensis	Charopidae	1
0.0170802	Alcadia (Analcadia) dysoni	Helicinidae	23
0.0172651	Zachrysia guantanamensis	Pleurodontidae	10
0.0172757	Libera subcavernula	Endodontidae	6
0.0172792	Pupina bipalatilis	Pupinidae	1
0.0172996	Pitys pagodiformis	Endodontidae	4
0.0173016	Balambania (Pseudocyclotus) aurantiellum	Assimineidae	1
0.0173146	Chondrula (Mastus) cretensis	Enidae	2
0.0173559	Spixia corderoi	Bulimulidae	8
0.0175483	Lauria cylindracea	Pupillidae	72
0.0175804	Torrecoptis costellaris	Urocoptidae	13
0.0176939	Dentellaria invalida	Pleurodontidae	49
0.0177177	Parvedentulina namorokae	Streptaxidae	1
0.0178074	Cochlicopa collina	Cochlicopidae	2
0.0178511	Macroceramus lineatus	Urocoptidae	5
0.0179126	Leptarionta costaricensis	XantHonycidae	5
0.0179229	Ashmunella thomsoniana	Polygyridae	26
0.0180244	Camaena xanthoderma	Camaenidae	3
0.018038	Ochrodermella pittieri	Subulinidae	4
0.0180553	Anixa zebuensis	Bradybaenidae	6
0.018111	Streptodera trachelostropha	Clausiliidae	1
0.0182202	Pterocyclus niasensis	Cyclophoridae	3
0.0183543	Mendana (Macrorbis) mumfordi	Euconulidae	1
0.0184871	Succinea bichlorata	Succineidae	1
0.0184996	Sinployea canalis	Charopidae	3
0.0188004	Cerion mcleani	Cerionidae	2
0.0188645	Trilamellaxis remediensis	Urocoptidae	7
0.0189307	Amastrella fragosa	Amastridae	1
0.0189572	Heteramastra sinistrorsa	Amastridae	1
0.0191571	Vitrea calderoni	Pristilomatidae	1
0.0192562	Phaedusa campayansis	Clausiliidae	1
0.0192712	Cyclophorus (Litostylus) poeciloneurum	Cyclophoridae	1
0.0192839	Zebrina fasciolata	Enidae	23
0.0193119	Limicolaria nakurana	Achatinidae	1
0.0193159	Cerion macularia	Cerionidae	3
0.0193952	Thapsia bigoti	Urocyclidae	1
0.0194816	Omphalotropis atomaria	Assimineidae	3
0.0195459	Tubuaia cylindrata	Achatinellidae	1
0.0196303	Acroptychia bigoti	Cyclophoridae	1
0.0196568	Megalophaedusa (Mesophaedusa) graciae	Clausiliidae	1
0.0196623	Succinea texta	Succineidae	1
0.0197059	Promoussonius promoussonius	Subulinidae	1
0.019723	Eutudora limbifera	Annulariidae	6
0.0197917	Taguahelix campbellica	Punctidae	1
0.0198055	Pseudonapaeus trigonochilus	Enidae	3
0.0198139	Achatina (Lissachatina) immaculata	Achatinidae	39
0.0198419	Helminthoglypta edwardsi	Helminthoglyptidae	2
0.0199368	Trochochlamys fraterna	Chronidae	4
0.0199845	Radiodiscus patagonicus	Charopidae	5
0.0200743	Xolotrema denotata	Polygyridae	37
0.0201365	Aegista accrescens	Bradybaenidae	1
0.0201917	Vertigo ronnebyensis	Vertiginidae	6
0.0202477	Cyathopoma innocens	Cyclophoridae	1
0.020255	Ferussacia aragonica	Ferussaciidae	1
0.0203136	Holospira tamaulipasensis	Urocoptidae	1
0.0203428	Promoussonius incertus	Subulinidae	1
0.0204334	Orthalicus reses	Orthalicidae	25
0.0205182	Ashmunella jamesensis	Polygyridae	1
0.020723	Omphalina cupreus	Godwiniidae	183
0.0208708	Nesodiscus fictus	Endodontidae	5
0.0208976	Stephanoda binneyana	Charopidae	1
0.0209068	Orthalicus ponderosus	Orthalicidae	11
0.0209764	Balea perversa	Clausiliidae	38
0.0211325	Eucobresia diaphana	Vitrinidae	10
0.0211631	Bulimulus fuscus	Bulimulidae	5
0.0211784	Camaena hahni	Camaenidae	2
0.0212495	Papuina plagiostoma	Camaenidae	2
0.0212991	Lucidella (Poenia) caymanensis	Helicinidae	22
0.0214332	Vertigo torrei	Vertiginidae	2
0.0215648	Pupinella funatoi	Pupinidae	8
0.0215739	Heteramastra whitei	Amastridae	1
0.0215992	Polloneriella contermina	Hygromiidae	5
0.0216045	Cerion narcissoni	Cerionidae	1
0.0216129	Gastrocopta (Sinalbinula) samoensis	Vertiginidae	18
0.021654	Boucardicus bedintae	Cyclophoridae	1
0.0218101	Thapsia decepta	Urocyclidae	1
0.0218586	Xesta bella	Ariophantidae	1
0.021875	Lamprocystis (Gaimia) misella	Euconulidae	11
0.0218841	Cerion nebula	Cerionidae	1
0.0219184	Gulella multidentata	Streptaxidae	1
0.0219372	Elia corpulenta	Clausiliidae	2
0.0220088	Subzebrinus sindica	Enidae	1
0.0220127	Glessula collettae	Subulinidae	1
0.022032	Chondropoma edouardi	Annulariidae	1
0.0223599	Acroptychia anaglypta	Cyclophoridae	1
0.0224258	Leiostyla vermiculosa	Pupillidae	1
0.0224768	Laminella straminea	Amastridae	8
0.0224795	Helicostyla (Opalliostyla) phaostyla	Bradybaenidae	2
0.0225537	Catinella (Mediappendix) hubrichti	Succineidae	2
0.0227477	Trochozonites tumidula	Urocyclidae	1
0.0228797	Euphaedusa ceylanica	Clausiliidae	2
0.0229083	Oxychilus hibernicus	Oxychilidae	1
0.0229188	Lamprocystis (Gaimia) hornbosteli	Euconulidae	4
0.0230435	Omphalina friabilis	Godwiniidae	57
0.0231102	Chamalycaeus tabelensis	Cyclophoridae	1
0.0231476	Parasitala margaritacea	Euconulidae	1
0.0231916	Cerion bryanti	Cerionidae	4
0.023207	Monilearia tumulora	Cochlicellidae	6
0.0234252	Fijianella cornucopia	Assimineidae	1
0.0234883	Tornatellina bilamellata	Achatinellidae	2
0.0235404	Neocyclotus checkleyi	Neocyclotidae	1
0.0235573	Hemiplecta obliquata	Ariophantidae	3
0.0235922	Trachycystis liricostata	Charopidae	1
0.0236792	Bocageia carpenteri	Subulinidae	4
0.023767	Plectotropis icela	Bradybaenidae	1
0.0238799	Phenacolimax (Gallandia) annularis	Vitrinidae	7
0.0239478	Hargravesia tumida	Pupinidae	3
0.0239861	Endothyrella plectostoma	Plectopylidae	4
0.0240792	Lissembryon dilatata	Pleurodontidae	10
0.0240999	Torrecoptis stricta	Urocoptidae	5
0.0241404	Masculus parva	Xanthonycidae	8
0.0242136	Laminella alexandri	Amastridae	6
0.0242645	Pleuropoma solidum	Helicinidae	2
0.0242751	Carychium javanum	Carychiidae	1
0.024338	Clavator eximius	Clavatoridae	6
0.0244606	Godwinia caperata	Godwiniidae	6
0.0244849	Albinaria christae	Clausiliidae	1
0.0245691	Subzebrinus arcuata	Enidae	1
0.0245868	Achatinella (Achatinellastrum) dimorpha	Achatinellidae	62
0.0246372	Bradybaena dissimilis	Bradybaenidae	3
0.0246953	Parvedentulina miaranoniae	Streptaxidae	1
0.0248088	Laminella remyi	Amastridae	1
0.0248449	Pseudachatina perelongata	Achatinidae	1
0.0249707	Drymaeus parvicygni	Bulimulidae	1
0.0250039	Megalomastoma verruculosum	Megalomastomatidae	5
0.0250112	Lamellaxis pallidus	Subulinidae	32
0.0251059	Pterocyclus bilabiatus	Cyclophoridae	1
0.0252459	Microcystis (Cnesticystic) kondoi	Euconulidae	1
0.0252998	Excavata elegantula	Helicinidae	4
0.0253051	Tropidophora pulchella	Pomatiidae	1
0.0253883	Palaina (Macropalaina) xiphidium	Diplommatinidae	1
0.0255549	Miselaoma weldii	Punctidae	3
0.0256056	Sultana sultana	Orthalicidae	12
0.0257739	Drymaeus rufescens	Bulimulidae	22
0.026066	Magilaoma parpictilis	Punctidae	1
0.0262255	Palaina (Macropalaina) perroquiniana	Diplommatinidae	1
0.0262269	Thaumastus largillierti	Bulimulidae	8
0.0262606	Cancelloconus amoenus	Euconulidae	1
0.0262914	Rhinus scobinatus	Bulimulidae	4
0.026446	Tropidophora crenulata	Pomatiidae	1
0.0265023	Gulella farquhari	Streptaxidae	4
0.0265904	Planilaoma luckmanni	Punctidae	1
0.0269225	Acicula benoiti	Aciculidae	1
0.0269646	Ceratopoma (Palaeohelicina) woodlarkense	Helicinidae	1
0.0271131	Candidula specialis	Helicidae	1
0.027166	Kaliella macrostoma	Helicarionidae	1
0.0272221	Flavoleacina hursti	Oleacinidae	2
0.0274872	Helix lutescens	Helicidae	19
0.0275397	Dolicheulota swinhoei	Bradybaenidae	1
0.0277653	Diplommatina (Sinica) septentrionalis	Diplommatinidae	6
0.0279775	Diplommatina (Sinica) cassa	Diplommatinidae	21
0.0280456	Truncatellina pygmaeorum	Vertiginidae	2
0.0280643	Labyrinthus tamsianus	Labyrinthidae	6
0.0282667	Leptopoma (Leptopoma) tagolandensis	Cyclophoridae	4
0.0283198	Metafruticicola naxiana	Hygromiidae	1
0.0283297	Diancta (Paradiancta) smithi	Diplommatinidae	1
0.0283585	Alcadia (Analcadia) salleana	Helicinidae	2
0.0283948	Achatinella (Achatinellastrum) curta	Achatinellidae	146
0.0284161	Bradybaena lantzi	Bradybaenidae	1
0.0284253	Pythia reeveana	Ellobiidae	7
0.028484	Pleurodonte parilis	Pleurodontidae	5
0.0285303	Anixa propitia	Bradybaenidae	2
0.028536	Coryda lindeni	Helminthoglyptidae	1
0.028585	Phaedusa aurigani	Clausiliidae	2
0.0288561	Chondropoma moralesi	Annulariidae	1
0.0289013	Andrefrancia costulifera	Charopidae	16
0.0289181	Daudebardia tarentina	Daudebardiidae	5
0.0289638	Amenixesta hunsteini	Helicarionidae	2
0.0289889	Helicella miyani	Hygromiidae	1
0.0290006	Faustella obserata	Hygromiidae	6
0.0290383	Helicarion altitudinis	Helicarionidae	1
0.0290411	Ambigua lucana	Helicidae	3
0.0291093	Cerion dimidiata	Cerionidae	11
0.0291605	Succinea inconspicua	Succineidae	1
0.0291994	Ambigua tetrazona	Helicidae	3
0.0292704	Sulfurina globulina	Helicinidae	5
0.0293562	Orthalicus delphinus	Orthalicidae	2
0.0294112	Sulcobasis scorteus	Camaenidae	2
0.029417	Gymnarion aloysiisabaudiae	Urocyclidae	5
0.0294617	Cerion confusum	Cerionidae	4
0.0294725	Ashmunella levettei	Polygyridae	49
0.0296066	Rhiostoma simplicilabre	Cyclophoridae	2
0.0298013	Hohenwartiana hohenwarti	Ferussaciidae	8
0.0298798	Chondrothyra affinis	Annulariidae	3
0.0299513	Vagavarix samana	Oleacinidae	1
0.0300626	Candidula meridionalis	Helicidae	13
0.0300635	Diplommatina (Sinica) bicolor	Diplommatinidae	3
0.0300811	Tudorina rangelina	Annulariidae	8
0.0302715	Palaina (Palaina) patula	Diplommatinidae	1
0.0302896	Pseudonapaeus przewalskii	Enidae	1
0.030323	Carychium striolatum	Carychiidae	1
0.0303274	Rupestrella rhodia	Chondrinidae	15
0.0303538	Cyclotopsis montana	Pomatiidae	1
0.0305263	Sonorella rooseveltiana	Xanthonycidae	9
0.0305575	Trochulus tumescens	Hygromiidae	1
0.0306568	Pedinogyra hayii	Caryodidae	19
0.0308501	Macrogonaxis micans	Streptaxidae	3
0.0308699	Amastra assimilis	Amastridae	12
0.030892	Gittenbergeria turriplana	Hygromiidae	4
0.0311414	Beckianum beckianum	Subulinidae	134
0.0312524	Flammulina albozonata	Charopidae	1
0.03127	Brachypodella (Brevipedella) angulifera	Urocoptidae	8
0.0314512	Bostryx pustulosus	Bulimulidae	2
0.0316048	Paravitrea toma	Pristilomatidae	1
0.031634	Trochonanina mesogaea	Urocyclidae	1
0.0317136	Sulfurina usakanensis	Helicinidae	1
0.031732	Euomphalia strigella	Hygromiidae	34
0.0317979	Hojeda elatior	Sagdidae	1
0.0318445	Inflectarius approximans	Polygyridae	6
0.0319732	Torrecoptis curta	Urocoptidae	1
0.0320103	Parachondrodes chordatus	Annulariidae	4
0.0321203	Prosopeas haughtoni	Subulinidae	3
0.0321692	Pollicaria crossei	Pupinidae	2
0.032229	Cytora kerrana	Pupinidae	1
0.0322516	Mesomphix (Omphix) inornatus	Godwiniidae	159
0.0322883	Fijianella laddi	Assimineidae	1
0.032322	Alinda wagneri	Clausiliidae	3
0.0324857	Euglandina liebmanni	Oleacinidae	9
0.0325206	Setipellis raripila	Helminthoglyptidae	2
0.0326534	Haploptychius pronus	Streptaxidae	1
0.0326762	Heterocoptis bermudezi	Urocoptidae	2
0.0328744	Simpulopsis brasiliensis	Amphibulimidae	3
0.0330955	Omphalotropis ceramensis	Assimineidae	2
0.0331045	Zaphysema mundum	Sagdidae	40
0.0331643	Spirorbula laciniosa	Helicidae	3
0.0332722	Cipangocharax okamurai	Cyclophoridae	2
0.0332905	Jaminia quadridens	Enidae	32
0.0333219	Ditropis whitei	Cyclophoridae	1
0.0333526	Diplommatina (Pseudopalaina) gowllandi	Diplommatinidae	2
0.0333945	Ventridens suppressus	Gastrodontidae	272
0.0334501	Albinaria glabella	Clausiliidae	1
0.0334638	Monacha ignorata	Helicidae	2
0.0335856	Capillacea angustior	Urocoptidae	7
0.0335947	Hemiphaedusa kyotoensis	Clausiliidae	9
0.0336176	Metamastra gulickiana	Amastridae	4
0.0336609	Kalidos ketronambrae	Ariophantidae	1
0.0336617	Cristataria delesserti	Clausiliidae	3
0.0337223	Lucerna oxytenes	Pleurodontidae	13
0.0338432	Herilla trilobia	Clausiliidae	1
0.0338465	Euhadra comma	Bradybaenidae	4
0.033929	Protoglyptus ovulum	Bulimulidae	2
0.0339774	Aegista aubryana	Bradybaenidae	2
0.0340783	Helicina invectita	Helicinidae	2
0.0342021	Chersaecia brachydiscus	Plectopylidae	1
0.0342328	Trishoplita hilgendorfi	Bradybaenidae	36
0.0342413	Tudora fossor	Annulariidae	9
0.0342502	Agardhiella parreyssi	Argnidae	5
0.0343041	Planispira gabata	Camaenidae	3
0.0344855	Ariophanta thyreus	Ariophantidae	3
0.0346807	Chondropoma caymanbracense	Annulariidae	6
0.0351584	Prosopeas cochliodes	Subulinidae	2
0.0353853	Ogasawarana ogasawarana	Helicinidae	19
0.0353861	Helicina (Pseudoligyra) tenuis	Helicinidae	20
0.0354133	Liguus virgineus	Orthalicidae	44
0.0355049	Garnieria mouhoti	Clausiliidae	2
0.0355432	Discula tetrica	Helicidae	4
0.0357073	Xenopoma aguayoi	Annulariidae	10
0.0358394	Bothriembryon dux	Bulimulidae	4
0.0358498	Pilula vatuvavyae	Charopidae	1
0.035919	Liobocageia interioris	Subulinidae	1
0.0359543	Incertae Sedis perscalptus	Polygyridae	1
0.036035	Drymaeus gibber	Bulimulidae	3
0.0363599	Sesara bouyeri	Helicarionidae	1
0.0364162	Labyrinthus (Isomeria) cymatodes	Labyrinthidae	9
0.0364626	Euconulus chlororaphe	Euconulidae	5
0.0365195	Holospira montivaga	Urocoptidae	2
0.0365616	Mirinaba planidens	Strophocheilidae	5
0.0365825	Hemiphaedusa (Pinguiphaedusa) expansilabris	Clausiliidae	26
0.0366716	Partula callifera	Partulidae	4
0.036674	Amastra baldwiniana	Amastridae	7
0.0366787	Hemitrochus filicosta	Helminthoglyptidae	1
0.0367777	Malacolimax tenellus	Limacidae	1
0.0368055	Cochlostyla ventricosa	Bradybaenidae	9
0.036948	Mastigophallus rangianus	Hygromiidae	7
0.0371107	Chondrula bayeri	Enidae	13
0.0372009	Cerion scutata	Cerionidae	2
0.0372737	Holospira milleri	Urocoptidae	1
0.0373203	Pernagera kingstonensis	Charopidae	1
0.0374756	Georissa japonica	Hydrocenidae	17
0.0375279	Pachystyla inversicolor	Helicarionidae	11
0.0376011	Cernuella mauretanica	Hygromiidae	8
0.0376573	Chamalycaeus vanbuensis	Cyclophoridae	1
0.0376852	Lignus mucidus	Achatinidae	2
0.0378445	Pseudonapaeus misera	Enidae	2
0.0378747	Lemniscia michaudi	Helicidae	6
0.0379024	Streptostyla fulvida	Spiraxidae	1
0.0379123	Dyakia regalis	Ariophantidae	2
0.0379656	Papuina nortoni	Camaenidae	1
0.0380461	Haploptychius fischeri	Streptaxidae	1
0.0380775	Oxychilus levis	Oxychilidae	4
0.0382282	Adamsiella variabilis	Annulariidae	29
0.0385141	Retinella simoni	Godwiniidae	1
0.0386294	Chloritis howesi	Camaenidae	1
0.0388205	Helicella aberrans	Hygromiidae	4
0.0389334	Strobilops strebeli	Strobilopsidae	2
0.03908	Torrecoptis purioensis	Urocoptidae	2
0.0391041	Agathylla biloba	Clausiliidae	2
0.0392479	Nicida tricincta	Diplommatinidae	1
0.0393647	Plectopylis linterae	Plectopylidae	1
0.0394498	Partulina (Eburnella) semicarinata	Achatinellidae	5
0.0395338	Punctum (Toltecia) vitreum	Punctidae	88
0.0395384	Opisthostoma (Plectostoma) hosei	Diplommatinidae	1
0.0395404	Vertigo (Angustula) milium	Vertiginidae	201
0.0396408	Drymaeus fusagasuganus	Bulimulidae	1
0.0396927	Pristiloma (Priscovitrea) nicholsoni	Pristilomatidae	1
0.0396997	Thoanteus gibbera	Enidae	9
0.0397075	Tropidophora sikorae	Pomatiidae	1
0.039732	Albinaria bigibbosa	Clausiliidae	4
0.0398257	Alopia ciucasiana	Clausiliidae	1
0.0398583	Monadenia infumata	Helminthoglyptidae	17
0.040049	Laoma ciliata	Punctidae	2
0.0401197	Hirasea biconcava	Discidae	2
0.0401888	Leptopeas paludinoides	Subulinidae	3
0.0401933	Theobaldius phaenotopicus	Cyclophoridae	1
0.0406509	Vertilla angustior	Vertiginidae	20
0.040733	Lobosculum pustuloides	Polygyridae	34
0.0407875	Chondropometes scopulorus	Annulariidae	1
0.0409158	Cochlostyla daphnis	Bradybaenidae	10
0.0409533	Lepidotrichia tagalensis	Helicarionidae	1
0.040954	Leptaxis drouetiana	Helicidae	2
0.0411128	Videna loocensis	Trochomorphidae	1
0.0412057	Haploptychius andamanicus	Streptaxidae	1
0.0412299	Rhiostoma macalpinewoodsi	Cyclophoridae	1
0.0412363	Parvedentulina sahantananae	Streptaxidae	1
0.041283	Cyathopoma philippinicum	Cyclophoridae	1
0.0416281	Lignus onager	Achatinidae	1
0.041705	Planispira macgregori	Camaenidae	1
0.0417135	Sinployea euryomphala	Charopidae	1
0.0418612	Macroceramus costulatus	Urocoptidae	5
0.0418852	Oreobba codonodes	Camaenidae	1
0.0419561	Cathaica secusana	Bradybaenidae	1
0.0420174	Troschelviana (Microviana) rupestris	Helicinidae	13
0.0420753	Cerion rubicunda	Cerionidae	22
0.0421774	Eurytus veranyi	Bulimulidae	2
0.0422517	Maurohelix sollieri	Helicidae	2
0.0424149	Serpho mathewsi	Charopidae	1
0.0424602	Tropidoptera alata	Amastridae	3
0.0425886	Ordtrachia septentrionalis	Camaenidae	1
0.0426066	Cyclophorus (Kobeltostylus) perdix	Cyclophoridae	6
0.0426362	Endoplon mollendorffi	Plectopylidae	2
0.0427154	Gulella analamerae	Streptaxidae	1
0.0427998	Pleuropoma (Aphanoconia) zonata	Helicinidae	1
0.0429992	Cochlostoma (Auritus) patulum	Diplommatinidae	11
0.0430201	Succinea interioris	Succineidae	1
0.0432846	Diplomphalus montrouzieri	Rhytididae	1
0.0433022	Pellicula depressa	Amphibulimidae	3
0.0433703	Tortulosa eurytrema	Pupinidae	1
0.0434534	Platypetasus innominata	Bradybaenidae	2
0.0434915	Hemicycla hierroensis	Helicidae	2
0.0435624	Otala ebusitana	Helicidae	2
0.0436104	Diplommatina (Diplommatina) germaini	Diplommatinidae	1
0.0436561	Neopetraeus atahualpa	Bulimulidae	7
0.0436715	Leiostracus (Pseudoxychona) dejectus	Bulimulidae	1
0.0436865	Austrochloritis victoriae	Camaenidae	2
0.043748	Ampelita (Vescona) robillardi	Acavidae	1
0.0437977	Helicodiscus hexodon	Helicodiscidae	1
0.0438491	Pomatias rivularis	Pomatiidae	12
0.0439818	Vagavarix paradisensis	Oleacinidae	1
0.044001	Amastra aurostoma	Amastridae	2
0.0440305	Tropidophora carinata	Pomatiidae	6
0.0441613	Pythia imperforata	Ellobiidae	2
0.044215	Hemiphaedusa moellendorffiana	Clausiliidae	7
0.0442376	Bostryx (Lissoacme) piuranus	Bulimulidae	3
0.0442719	Helicina (Olygyra) oaxacana	Helicinidae	3
0.0443842	Chondropoma nobile	Annulariidae	2
0.044485	Melaniella gracillima	Oleacinidae	38
0.0446987	Conibycus infantilis	Euconulidae	1
0.0447407	Amastrella melanosis	Amastridae	3
0.0448019	Megalophaedusa (Mesophaedusa) subhickonis	Clausiliidae	2
0.0448366	Gongylostoma elegans	Urocoptidae	32
0.0448828	Cerion vagabunda	Cerionidae	1
0.0449205	Coelocentrum hinkleyi	Urocoptidae	4
0.0449758	Lauria bequaerti	Pupillidae	2
0.0449789	Euvaricella spina	Oleacinidae	9
0.045052	Planispira atacta	Camaenidae	2
0.0451365	Philomycus crosseanus	Philomycidae	1
0.0451388	Ilikala fusca	Amastridae	8
0.0452012	Papillifera josephinae	Clausiliidae	3
0.0452642	Albinaria milleri	Clausiliidae	2
0.0453586	Cyrnotheba perlevis	Helicidae	3
0.0454263	Anixa siquijorensis	Bradybaenidae	6
0.0454744	Ferussacia (Pegea) oranensis	Ferussaciidae	1
0.045899	Helicostyla (Opalliostyla) jonasi	Bradybaenidae	13
0.0459427	Peristoma boettgeri	Enidae	2
0.0459815	Mentissoidea litotes	Clausiliidae	3
0.0459996	Shuttleworthia obtusa	Oleacinidae	4
0.0460675	Drepanostomella excisa	Scolodontidae	2
0.0461729	Chondrina circumplicata	Chondrinidae	4
0.0462648	Aperostoma (Lagocyclus) vesconisi	Neocyclotidae	1
0.0464011	Partulina (Eburnella) porcellana	Achatinellidae	6
0.0464431	Tornatellaria occidentalis	Achatinellidae	15
0.0464809	Pupina subpolita	Pupinidae	1
0.0465633	Mirus reiniana	Enidae	52
0.0465981	Payenia saxatilis	Endodontidae	2
0.0465986	Orthalicus bifulguratus	Orthalicidae	1
0.0468393	Chondropomartes irradians	Annulariidae	19
0.0468791	Johaniceramus longus	Urocoptidae	2
0.0468947	Carychium nipponense	Carychiidae	9
0.0469287	Discula tectiformis	Helicidae	10
0.0472035	Helix pathetica	Helicidae	2
0.0472823	Leptopoma (Trocholeptopoma) caroli	Cyclophoridae	2
0.0473234	Glessula beddomei	Subulinidae	1
0.0473983	Scabrina denudata	Cyclophoridae	2
0.0476114	Trochoidea cumiae	Helicidae	4
0.0476396	Cerion hessei	Cerionidae	1
0.0476439	Truncatella marginata	Truncatellidae	38
0.0476484	Nipponochlamys semisericata	Helicarionidae	6
0.0477098	Lucidella (Poeniella) jeremiensis	Helicinidae	2
0.0478132	Plectopylis verecunda	Plectopylidae	1
0.0478315	Moellendorffia trisinuata	Camaenidae	4
0.0479908	Leptocala smithii	Achatinidae	6
0.0479925	Videna electra	Trochomorphidae	10
0.048129	Ceratopoma (Palaeohelicina) coxeni	Helicinidae	4
0.0481455	Pupisoma pulvisculum	Valloniidae	1
0.0485302	Cerion shrevei	Cerionidae	1
0.0485445	Proserpinella berendti	Proserpinellidae	1
0.0485727	Radiocentrum chiricahuana	Oreohelicidae	38
0.0485745	Gastrocopta servilis	Vertiginidae	169
0.04861	Gulella ituriensis	Streptaxidae	1
0.0487176	Gastrocopta (Sinalbinula) fischeri	Vertiginidae	1
0.0487217	Cochlodina marginata	Clausiliidae	13
0.0488855	Ceras zenkeri	Subulinidae	1
0.0489057	Craspedotropis cuspidata	Cyclophoridae	1
0.0490217	Rachis bengalensis	Enidae	8
0.049056	Pleuroxia arcigerens	Camaenidae	1
0.0491435	Sheldonia hudsoniae	Urocyclidae	2
0.0491462	Partula candida	Partulidae	7
0.0492747	Tropidophora consanguinea	Pomatiidae	1
0.0493641	Coneuplecta confusa	Euconulidae	5
0.0494744	Luchuphaedusa aratorum	Clausiliidae	4
0.0495426	Gulella (Digulella) capitata	Streptaxidae	6
0.0495853	Leptopeas marmorense	Subulinidae	1
0.0496012	Dautzenbergiella (Mansuyiella) mansuyi	Clausiliidae	1
0.0496694	Coelocion australis	Megaspiridae	5
0.0497383	Nesopupa gonioplax	Vertiginidae	1
0.0499422	Helminthoglypta arrosa	Helminthoglyptidae	101
0.0500415	Pleuropoma gomeaense	Helicinidae	2
0.0501114	Aegista gotoensis	Bradybaenidae	4
0.05024	Vertigo shimochii	Vertiginidae	1
0.0502498	Caseolus sphaerulus	Helicidae	5
0.0502934	Palaina (Palaina) chrysostoma	Diplommatinidae	1
0.0503778	Cathaica fasciola	Bradybaenidae	20
0.050395	Parachondrops campbelli	Annulariidae	9
0.0506128	Bulimulus guadalupensis	Bulimulidae	257
0.0506451	Amastra makawaoensis	Amastridae	1
0.0506478	Chamalycaeus takahashii	Cyclophoridae	1
0.0506993	Oreohelix carinifera	Oreohelicidae	5
0.0507001	Idyla rugicollis	Clausiliidae	2
0.05071	Eurychlamys platychlamys	Euconulidae	1
0.0507251	Megalophaedusa (Mundiphaedusa) hosayaka	Clausiliidae	10
0.0507661	Campylaea (Faustina) faustina	Helicidae	24
0.0510241	Pachnodus flexilabri	Enidae	1
0.0510273	Hemitrochus xanthophaes	Helminthoglyptidae	1
0.051158	Leiostyla wollastoni	Pupillidae	2
0.0511591	Placostylus (Placocharis) macgillivrayi	Bulimulidae	5
0.0514005	Formosana pacifica	Clausiliidae	1
0.0515466	Geomelania sinuosa	Truncatellidae	25
0.0516772	Cernuella cistora	Hygromiidae	2
0.0516773	Oscarboettgeria gagriensis	Hygromiidae	1
0.0517935	Pupina meridionalis	Pupinidae	5
0.0519942	Succinea daucina	Succineidae	1
0.0520998	Isabellaria boeotia	Clausiliidae	2
0.0521055	Parakaliella modesta	Helicarionidae	3
0.0521278	Archachatina (Tholachatina) transvaalensis	Achatinidae	1
0.0523773	Temesa bicolor	Clausiliidae	2
0.0524419	Sinicola murata	Plectopylidae	3
0.0525201	Cernuella variegata	Hygromiidae	5
0.0525654	Diplommatina (Antigaster) vespa	Diplommatinidae	3
0.0525997	Alycaeus (Alycaeus) hosei	Cyclophoridae	1
0.0526273	Campylaea (Delphinatia) alpina	Helicidae	24
0.0527115	Chondrina (Granopupa) rupestris	Chondrinidae	8
0.0527488	Rhagada supracostata	Camaenidae	1
0.0527603	Haplotrema duranti	Haplotrematidae	12
0.0527669	Promonturconchum superbum	Camaenidae	1
0.0528465	Patera laevior	Polygyridae	5
0.052857	Plectotropis sinkaitzensis	Bradybaenidae	1
0.0529121	Phaedusa penangensis	Clausiliidae	1
0.0530015	Zachrysia proboscidea	Pleurodontidae	18
0.0532474	Gulella falconi	Streptaxidae	1
0.0532573	Oligospira polei	Acavidae	1
0.0532759	Trochomorpha (Nigritella) lomonti	Trochomorphidae	4
0.0534806	Brachypodella (Ischnostrophina) samana	Urocoptidae	4
0.0534881	Auriculella tenella	Achatinellidae	11
0.0535336	Amplirhagada kalumburuana	Camaenidae	1
0.0535528	Stauroglypta alveus	Sagdidae	3
0.0536613	Strophocheilus pudicus	Strophocheilidae	6
0.0536814	Steenbergia pauperculum	Helicidae	22
0.0538009	Luchuphaedusa (Nesiophaedusa) okinoerabuensis	Clausiliidae	9
0.0538364	Xesta ignescens	Ariophantidae	1
0.0538444	Eremarionta immaculata	Helminthoglyptidae	4
0.0539101	Xerarionta levis	XantHonycidae	23
0.0539322	Cupedora loriolanus	Camaenidae	1
0.0541126	Fadyenia bridgesiana	Helicinidae	3
0.0541438	Helminthoglypta peninsularis	Helminthoglyptidae	6
0.0541835	Pomatias canariensis	Pomatiidae	8
0.054187	Cerion sagraianum	Cerionidae	12
0.054228	Humboldtiana taylori	Helminthoglyptidae	1
0.0542824	Achatinella lorata	Achatinellidae	238
0.0543646	Helicodiscus fimbriatus	Helicodiscidae	8
0.0543947	Aspastus (Poecilocharis) hartmanni	Bulimulidae	2
0.0547073	Euclastaria musicola	Helminthoglyptidae	33
0.0547698	Letourneuxia numidica	Arionidae	1
0.054805	Megalobulimus popelairianus	Megalobulimidae	23
0.0548953	Phenacolimax (Insulivitrina) lamarcki	Vitrinidae	6
0.0548999	Buliminus exquisitus	Enidae	1
0.0549734	Oxychilus hemipsoricus	Oxychilidae	2
0.0550458	Pelatrinia helenae	Subulinidae	1
0.0551528	Lehmannia marginatus	Limacidae	4
0.0551683	Bostryx (Lissoacme) mejillonensis	Bulimulidae	1
0.0552127	Tornatellides virgula	Achatinellidae	1
0.0552513	Bradybaena paricincta	Bradybaenidae	1
0.0552875	Sonorelix peninsularis	Helminthoglyptidae	3
0.0553346	Ampelita (Xystera) stumpffi	Acavidae	2
0.055358	Geophorus acutus	Helicinidae	8
0.055572	Cochlodinella soluta	Urocoptidae	3
0.055596	Holospira (Haplocion) mesolia	Urocoptidae	9
0.0557047	Cochlodinella blainiana	Urocoptidae	6
0.0557269	Saulaepoma sauliae	Annulariidae	4
0.0557633	Plectotropis lautsi	Bradybaenidae	5
0.0557634	Medora macarana	Clausiliidae	11
0.0558081	Striosubulina striatella	Subulinidae	11
0.0558273	Cernuella orbignyi	Hygromiidae	2
0.0559711	Hirasea planulata	Discidae	1
0.0560244	Kalidos avanalamerae	Ariophantidae	1
0.0560705	Pupilla (Omegapilla) chinensis	Pupillidae	2
0.0560908	Gastrocopta (Sinalbinula) avanica	Vertiginidae	1
0.0561737	Bahiensis ringens	Odontostomidae	1
0.0562211	Parachondrodes erectus	Annulariidae	1
0.0562523	Torrecoptis cinerea	Urocoptidae	2
0.0563121	Xerocrassa cauta	Helicidae	4
0.0563374	Georissa pyxis	Hydrocenidae	1
0.0563582	Leptopoma (Trocholeptopoma) regulare	Cyclophoridae	4
0.0564376	Kalidos richardi	Ariophantidae	1
0.0565406	Drymaeus intrapictus	Bulimulidae	2
0.0566936	Cyclophorus (Glossostylus) messageri	Cyclophoridae	1
0.0567162	Carelia necra	Amastridae	4
0.0568348	Albinaria anatolica	Clausiliidae	2
0.0569375	Coelostemma fusca	Urocoptidae	1
0.0569486	Aegista chejuensis	Bradybaenidae	1
0.0570617	Zachrysia bayamensis	Pleurodontidae	23
0.0570684	Succinea fulgens	Succineidae	3
0.0570784	Helminthoglypta madreana	Helminthoglyptidae	1
0.0570857	Diplommatina (Sinica) cyrtochilus	Diplommatinidae	6
0.0571302	Neniops smithiae	Clausiliidae	1
0.0571852	Scabrina vescus	Cyclophoridae	1
0.0572717	Pythia semisulcata	Ellobiidae	1
0.0572929	Stenotrema hirsutum	Polygyridae	288
0.0572978	Gulella ankaranensis	Streptaxidae	1
0.0573004	Strobilops romani	Strobilopsidae	1
0.057354	Ciliella ciliata	Hygromiidae	11
0.057391	Euphaedusa hungerfordiana	Clausiliidae	7
0.0574811	Leptaxis leptostyla	Helicidae	2
0.0575061	Coxia kinabaluensis	Trochomorphidae	2
0.0575686	Phrixgnathus subariel	Punctidae	1
0.0576214	Helicostyla (Calocochlea) pan	Bradybaenidae	12
0.0578237	Patera (Vesperpatera) indianorum	Polygyridae	11
0.057912	Partula obliterata	Partulidae	2
0.0581647	Drymaeus venezuelensis	Bulimulidae	1
0.0582081	Protoglyptus subcostatus	Bulimulidae	2
0.0582276	Endodonta concentrata	Endodontidae	3
0.058311	Tetrentodon scalarina	Urocoptidae	12
0.0583152	Sphincterochila maroccana	Helicidae	34
0.0583403	Geomelania greyana	Truncatellidae	6
0.0583524	Sonorella arida	Xanthonycidae	32
0.0584252	Galeata cilicica	Clausiliidae	1
0.0585121	Diplommatina (Pseudopalaina) ringens	Diplommatinidae	2
0.0585763	Pupinella smithi	Pupinidae	1
0.0587721	Vitrinoconus cyathellus	Trochomorphidae	2
0.0588173	Cerion turnerae	Cerionidae	1
0.0588321	Cerion ultima	Cerionidae	2
0.0588555	Eurytus gibbonius	Bulimulidae	6
0.0590963	Mesanella monochroa	Bradybaenidae	18
0.0591047	Amphibulima browni	Amphibulimidae	1
0.059135	Varicella (Varicellula) blandiana	Oleacinidae	32
0.0592557	Aegista chosenica	Bradybaenidae	1
0.0592572	Ambigua amalfitana	Helicidae	3
0.0593336	Tornatellides moomomiensis	Achatinellidae	4
0.0595163	Gulella regularis	Streptaxidae	1
0.0595168	Carelia sinclairi	Amastridae	7
0.0595532	Ptychopoma lienense	Cyclophoridae	1
0.059607	Poteria pallescens	Neocyclotidae	5
0.0596179	Bothriembryon physodes	Bulimulidae	1
0.0596283	Vertigo modesto	Vertiginidae	1
0.0598014	Diplommatina (Sinica) insularum	Diplommatinidae	4
0.0599287	Sitala phyllophila	Ariophantidae	1
0.0599374	Torrecoptis oleacea	Urocoptidae	3
0.0599798	Tropidophora balteata	Pomatiidae	1
0.0600877	Peruinia flachi	Clausiliidae	6
0.0602008	Helminthoglypta contracostae	Helminthoglyptidae	10
0.0603959	Homorus malleatus	Subulinidae	2
0.060414	Daedalochila texasiana	Polygyridae	203
0.060471	Zilchistrophia obvoluta	Corillidae	2
0.0605633	Neosubulina gloynii	Subulinidae	4
0.0607221	Platysuccinea portoricensis	Sagdidae	12
0.0608475	Caspiophaedusa perlucens	Clausiliidae	3
0.0608565	Curvella redfieldi	Subulinidae	2
0.0609296	Diplommatina (Sinica) javana	Diplommatinidae	1
0.0609949	Striatura (Pseudohyalina) discus	Gastrodontidae	4
0.0610947	Wainuia nasuta	Rhytididae	1
0.0611618	Pleuropoma kalaoense	Helicinidae	3
0.0615432	Aulacospira hololoma	Hypselostomatidae	3
0.0617021	Drymaeus longinguus	Bulimulidae	1
0.0617522	Alycaeus (Alycaeus) compactus	Cyclophoridae	2
0.0618167	Ampelita (Xystera) xystera	Acavidae	24
0.0620595	Ischnocion triptyx	Subulinidae	5
0.0620983	Geophorus pseudomphalus	Helicinidae	1
0.0621644	Candidula majoricensis	Helicidae	1
0.0622008	Subulina thysvillensis	Subulinidae	1
0.0622201	Planostemma miranda	Urocoptidae	2
0.0622351	Oreohomorus banjoensis	Subulinidae	1
0.0624265	Sulcobasis rubra	Camaenidae	2
0.0624541	Liocallonia propinqua	Urocoptidae	10
0.062614	Nenisca bartschi	Clausiliidae	1
0.0626212	Camaena vulpis	Camaenidae	1
0.0626309	Omphalotropis (Scalinella) elongata	Assimineidae	5
0.0626485	Cochlostyla ticaonica	Bradybaenidae	18
0.062873	Bulimulus sepulchralis	Bulimulidae	31
0.0629307	Symptychia orientalis	Clausiliidae	3
0.062938	Radiocentrum discus	Oreohelicidae	1
0.0630884	Priotrochatella josephinae	Helicinidae	9
0.0632017	Edentulina alluaudi	Streptaxidae	1
0.0633869	Agathylla sulcosa	Clausiliidae	29
0.0633909	Polygyra plana	Polygyridae	67
0.0637453	Herilla frauenfeldi	Clausiliidae	3
0.063811	Mohavelix micrometallea	Xanthonycidae	1
0.0639757	Sonorella cananea	Xanthonycidae	1
0.0640014	Poecilozonites cupula	Gastrodontidae	4
0.0641235	Euonyma varia	Subulinidae	2
0.064202	Varicella (Varicellula) tenera	Oleacinidae	20
0.064365	Holospira amalthea	Urocoptidae	1
0.0644291	Ventridens cerinoideus	Gastrodontidae	37
0.0644487	Punctum hottentota	Punctidae	1
0.0644869	Diplommatina (Diplommatina) baritensis	Diplommatinidae	1
0.0646282	Giffordius pinchoti	Polygyridae	9
0.064816	Trochulus peregrina	Hygromiidae	1
0.064831	Isabellaria coarctata	Clausiliidae	3
0.0649322	Paravitrea lapilla	Pristilomatidae	2
0.065052	Poiretia cornea	Oleacinidae	5
0.0650893	Subulina totistriata	Subulinidae	1
0.0650896	Realia egea	Pupinidae	7
0.065204	Gollumia filocincta	Pristilomatidae	1
0.0652089	Cathaica notophila	Bradybaenidae	1
0.0652218	Austroselenites flora	Haplotrematidae	6
0.0652455	Thalassohelix minuta	Charopidae	1
0.0653102	Plebecula giramica	Helicidae	4
0.0653338	Tropidophora insularis	Pomatiidae	2
0.0653618	Placostylus fibratus	Bulimulidae	66
0.065376	Epiphragmophora patasensis	Epiphragmophoridae	3
0.0654522	Napaeus variatus	Enidae	5
0.0654613	Candidula usticensis	Helicidae	3
0.0654796	Hypselostyla camelopardalis	Bradybaenidae	20
0.0655077	Pseudocampylaea lowei	Helicidae	7
0.0657401	Subuliniscus olivaceus	Subulinidae	1
0.0658838	Euonyma platyacme	Subulinidae	1
0.0658875	Miradiscops lobaterita	Scolodontidae	1
0.065947	Georissa biangulata	Hydrocenidae	2
0.0660338	Diplomorpha peasei	Bulimulidae	1
0.066153	Cerion prognata	Cerionidae	1
0.066258	Diplopoma aguadillense	Annulariidae	5
0.066352	Euconulus obesiconus	Euconulidae	1
0.0663689	Plagioptycha bondi	Helminthoglyptidae	1
0.0663871	Euchondrus saulcyi	Enidae	3
0.0664079	Sitala attegia	Ariophantidae	3
0.0664304	Charpentieria (Itala) itala	Clausiliidae	86
0.0667505	Rectaxis granum	Spiraxidae	3
0.0667506	Trissexodon quadrasi	Helicidae	1
0.0669153	Cyathopoma vavatsotra	Cyclophoridae	1
0.0669575	Pene fouroisi	Enidae	3
0.0670301	Sonorella fairbanksi	Xanthonycidae	1
0.0670923	Tortulosa decora	Pupinidae	2
0.0671664	Rachis sanguinea	Enidae	4
0.0672091	Cyclophorus (Glossostylus) jourdyi	Cyclophoridae	4
0.0673018	Bostryx (Discobostryx) planissimus	Bulimulidae	1
0.0673491	Siciliaria crassicostata	Clausiliidae	6
0.0673627	Acavus phoenix	Acavidae	17
0.0674798	Euglandina striata	Oleacinidae	10
0.0674852	Xerolenta obvia	Hygromiidae	57
0.0675733	Euhadra sigeonis	Bradybaenidae	15
0.0677582	Sonorella optata	Xanthonycidae	14
0.067759	Lamellidea (Auhea) adamsoni	Achatinellidae	4
0.0678276	Megalobulimus auritus	Megalobulimidae	3
0.0678447	Linisa bicruris	Polygyridae	5
0.0678909	Antinous doriae	Helicarionidae	1
0.06791	Neocyclotus (Incidostoma) inca	Neocyclotidae	4
0.0679727	Ptychotrema (Haplonepion) quadrinodatum	Streptaxidae	2
0.0680074	Euglandina nympha	Oleacinidae	1
0.0680835	Sultana (Metorthalicus) wrzesniowskii	Orthalicidae	1
0.0681847	Pleuropoma articulatum	Helicinidae	2
0.0682586	Chondrula libanica	Enidae	2
0.0683108	Lepidotrichia flavida	Helicarionidae	1
0.0684819	Partulina subpolita	Achatinellidae	1
0.0686073	Boettgeria depauperata	Clausiliidae	1
0.0686214	Ptychotrema limbatum	Streptaxidae	1
0.068651	Thaumastus (Scholvienia) porphyrius	Bulimulidae	7
0.06866	Trochulus parlatoris	Hygromiidae	4
0.0687151	Aerotrochus caymanbracensis	Sagdidae	1
0.0687625	Trachyorthalicus fraseri	Orthalicidae	1
0.0688662	Sphaerospira zebina	Camaenidae	1
0.0689001	Crystallopsis fictilia	Camaenidae	1
0.0689102	Corona rosenbergi	Orthalicidae	1
0.0690328	Edentulina martensi	Streptaxidae	1
0.0690579	Craticula monticola	Pupillidae	4
0.0692073	Helenoconcha napoleonis	Charopidae	1
0.0693045	Fadyenia tayloriana	Helicinidae	2
0.0693655	Diplommatina (Sinica) boettgeri	Diplommatinidae	4
0.0694144	Urocoptis cylindrus	Urocoptidae	34
0.0694245	Chondropoma xenicum	Annulariidae	2
0.069506	Scabrina locardi	Cyclophoridae	2
0.0695171	Boucardicus kikarivoi	Cyclophoridae	1
0.0695792	Elaphroconcha javanicensis	Ariophantidae	5
0.0696634	Lucerna vacillans	Pleurodontidae	6
0.0697236	Idyla bicolor	Clausiliidae	1
0.0697713	Papuina arrowensis	Camaenidae	1
0.0698119	Cyclophorus (Glossostylus) palawanensis	Cyclophoridae	2
0.0698602	Diplommatina tumida	Diplommatinidae	1
0.069943	Gonaxis quadrilateralis	Streptaxidae	1
0.0699576	Dentellaria atavus	Pleurodontidae	8
0.0699773	Palaina (Palaina) dohertyi	Diplommatinidae	1
0.0700257	Lamellidea ogasawarana	Achatinellidae	6
0.0700305	Diplommatina (Sinica) lyrata	Diplommatinidae	2
0.0700561	Cyathopoma molotra	Cyclophoridae	1
0.0701199	Helicella montserratensis	Hygromiidae	1
0.0701734	Hypnophila incerta	Cochlicopidae	1
0.0701919	Megannularia rosenbergi	Annulariidae	3
0.0702287	Agathylla goldi	Clausiliidae	6
0.0702647	Pterocyclus angulifera	Cyclophoridae	1
0.0704497	Solatopupa psarolena	Chondrinidae	1
0.070464	Pleuropoma yoshiwaranum	Helicinidae	13
0.0704759	Limicolaria tryoniana	Achatinidae	1
0.0705668	Sphincterochila (Albea) rozeti	Helicidae	7
0.0707526	Cerion plebeia	Cerionidae	2
0.0708017	Liardetia sculpta	Euconulidae	10
0.0708156	Oligozaptyx hedleyi	Clausiliidae	6
0.0708173	Trochomorpha (Nigritella) vestersi	Trochomorphidae	1
0.0708535	Aspastus sellersi	Bulimulidae	3
0.0708679	Diplommatina (Sinica) luchuana	Diplommatinidae	8
0.0709467	Bostryx (Lissoacme) huarazensis	Bulimulidae	1
0.0714895	Agardhiella macrodonta	Argnidae	2
0.0715291	Geostilbia gundlachi	Ferussaciidae	17
0.0715435	Cernuella erythraea	Hygromiidae	1
0.0715983	Amastrella luctuosa	Amastridae	3
0.0716695	Daedalochila suprazonata	Polygyridae	3
0.0718176	Euhadra peliomphala	Bradybaenidae	120
0.0719685	Protobeliscus riparius	Subulinidae	3
0.0720516	Pupina robusta	Pupinidae	1
0.0721054	Parvedentulina tsingia	Streptaxidae	1
0.0721282	Ankoravaratra ambrensis	Maizaniidae	1
0.0722728	Radiodiscus proameri	Charopidae	2
0.0722768	Gulella ruthae	Streptaxidae	1
0.0722928	Ponapea ponapensis	Trochomorphidae	1
0.07241	Pseudonapaeus intumescens	Enidae	1
0.0724818	Alopia nordsiecki	Clausiliidae	1
0.0724822	Chittypoma mirandum	Annulariidae	9
0.0725915	Thalassohelix igniflua	Charopidae	1
0.0725942	Hypnophila cyclothyra	Cochlicopidae	1
0.0727299	Gonospira callifera	Streptaxidae	4
0.0728414	Thaumatodon decemplicata	Endodontidae	1
0.0730019	Plectopylis bensoni	Plectopylidae	6
0.0730743	Oxychilus (Morlina) glaberrima	Oxychilidae	1
0.0731058	Tropidophora unifasciata	Pomatiidae	1
0.0731414	Sonorella bagnarai	Xanthonycidae	2
0.0731567	Planispira deaniana	Camaenidae	2
0.0734337	Coelostemma hazelae	Urocoptidae	1
0.0734503	Holospira mariae	Urocoptidae	1
0.0736113	Taipidon petricola	Endodontidae	3
0.0736211	Hemitrochus constantior	Helminthoglyptidae	10
0.0736668	Pupina exclamationis	Pupinidae	2
0.0737395	Helminthoglypta sasabe	Helminthoglyptidae	1
0.0738403	Drymaeus nigrofasciatus	Bulimulidae	4
0.0738508	Ariophanta nicobarica	Ariophantidae	2
0.0738805	Limax hyperboreus	Limacidae	1
0.07395	Achatina natalensis	Achatinidae	1
0.0740319	Otala subsenilis	Helicidae	1
0.0740736	Ferussacia (Pegea) letourneuxi	Ferussaciidae	1
0.0741448	Siciliaria calcarae	Clausiliidae	11
0.0742212	Tetrentodon modesta	Urocoptidae	6
0.0742534	Eurytus jacksoni	Bulimulidae	3
0.0742767	Placostylus (Basileostylus) bollonsi	Bulimulidae	7
0.0743251	Humboldtiana texana	Helminthoglyptidae	10
0.0743537	Symptychia massageri	Clausiliidae	1
0.0743876	Ashmunella ferrissi	Polygyridae	8
0.0744705	Ashmunella milesi	Polygyridae	1
0.0745661	Adelopoma occidentalis	Diplommatinidae	6
0.0746602	Ashfordia granulata	Hygromiidae	1
0.0747548	Macrogastra (Pyrostoma) latestriata	Clausiliidae	8
0.0747964	Streptostele leopoldvillensis	Streptaxidae	1
0.0748179	Pterocyclus berthae	Cyclophoridae	2
0.0748769	Vertigo hebardi	Vertiginidae	3
0.0749577	Faustella capsella	Hygromiidae	1
0.0750727	Sinoennea larvula	Streptaxidae	1
0.0751048	Aegopis gemonensis	Zonitidae	14
0.0751554	Cerion columna	Cerionidae	6
0.0751734	Gibbulinopsis aeoli	Pupillidae	1
0.0752214	Chloraea paradoxa	Bradybaenidae	2
0.0752425	Spelaeoconcha polymorpha	Enidae	1
0.0752526	Kondoa asteriscus	Trochomorphidae	3
0.0752546	Gulella (Digulella) cavidens	Streptaxidae	2
0.075289	Leptachatina scutilis	Amastridae	2
0.0754871	Cerion peravita	Cerionidae	1
0.075584	Helicigona heldreichi	Helicidae	8
0.0756514	Solaropsis (Psadara) tiloriensis	Pleurodontidae	1
0.075738	Xanthomelon durvillii	Camaenidae	4
0.07576	Partulina (Partulinella) induta	Achatinellidae	4
0.0757677	Gastrocopta (Sinalbinula) tatei	Vertiginidae	2
0.0759528	Boucardicus divei	Cyclophoridae	3
0.0760332	Mesanella stolidata	Bradybaenidae	1
0.0761632	Pukunia acuta	Achatinellidae	1
0.0762507	Abbottella wilhelmi	Annulariidae	3
0.0763543	Chondropoma vanattae	Annulariidae	2
0.0764262	Mirus gracilispirus	Enidae	1
0.0764794	Phoenicobius brachyodon	Bradybaenidae	5
0.0765135	Helminthoglypta nickliniana	Helminthoglyptidae	73
0.0765502	Orthalicus capax	Orthalicidae	5
0.0766058	Auriculella diaphana	Achatinellidae	87
0.0768193	Alycaeus (Dicharax) edi	Cyclophoridae	1
0.0769302	Euphaedusa cumingiana	Clausiliidae	7
0.0771692	Perideriopsis fallsensis	Achatinidae	4
0.077193	Salasiella margaritacea	Oleacinidae	3
0.0772352	Santotrochus layardi	Trochomorphidae	5
0.0773091	Trilamellaxis fallax	Urocoptidae	1
0.0773409	Cochlostoma (Obscurella) hidalgoi	Diplommatinidae	4
0.077665	Costavarix lioderma	Oleacinidae	25
0.0779242	Diplommatina (Sinica) crystallodes	Diplommatinidae	2
0.0779344	Amastra durandi	Amastridae	2
0.0780266	Petraeomastus moellendorffi	Enidae	1
0.0780493	Thysanophora intonsa	Thysanophoridae	1
0.0782184	Pseudohelicarion compactus	Euconulidae	3
0.0782249	Proserpinula discoidea	Sagdidae	28
0.0783379	Arion (Kobeltia) hortensis	Arionidae	1
0.0786313	Hendersoniella palmeri	Urocoptidae	4
0.0786348	Amastra nubilosa	Amastridae	15
0.0788748	Andrefrancia lifuana	Charopidae	3
0.0788861	Napaeus rufobrunneus	Enidae	3
0.0789082	Thaumatodon multilamellata	Endodontidae	3
0.078963	Sinployea princei	Charopidae	1
0.079005	Amphorella (Cylichnidia) cylichna	Ferussaciidae	4
0.0790085	Succinea casta	Succineidae	12
0.0791375	Letitia diomedes	Camaenidae	1
0.0792302	Chondrus orientalis	Enidae	3
0.0793175	Euglandina sowerbyana	Oleacinidae	18
0.0794675	Ashmunella tetrodon	Polygyridae	44
0.0794886	Dentellaria amabilis	Pleurodontidae	4
0.0795187	Succinea globospira	Succineidae	3
0.0795274	Drymaeus lacteus	Bulimulidae	2
0.0796611	Pristiloma japonica	Pristilomatidae	3
0.0797509	Hemitrochus varians	Helminthoglyptidae	140
0.0797786	Ariophanta laevipes	Ariophantidae	11
0.0798011	Euglandina tepicensis	Oleacinidae	1
0.079819	Glessula nilagarica	Subulinidae	4
0.0799763	Stenogyropsis turritus	Bradybaenidae	3
0.0800392	Rachis sabatieri	Enidae	2
0.0800909	Sphaerospira septentrionalis	Camaenidae	3
0.0801302	Notodiscus hookeri	Charopidae	1
0.0801847	Holospira mitraensis	Urocoptidae	2
0.0802834	Cerion lineota	Cerionidae	4
0.080439	Humboldtiana buffoniana	Helminthoglyptidae	8
0.0804436	Daedalochila avara	Polygyridae	23
0.0804585	Boucardicus dominiqui	Cyclophoridae	1
0.0804927	Pterocyclus pseudocumingi	Cyclophoridae	1
0.0806998	Lamellidea subcylindrica	Achatinellidae	7
0.0809567	Deroceras hesperium	Limacidae	1
0.0810253	Hemicena cerrateae	Clausiliidae	1
0.0810783	Diplommatina (Sinica) lateralis	Diplommatinidae	2
0.0811481	Cerion ramsdeni	Cerionidae	11
0.0812498	Pacificella variabilis	Achatinellidae	3
0.0813161	Leptachatina illimis	Amastridae	2
0.0813844	Pararyssota maxima	Chronidae	6
0.0814771	Sonorelix harperi	Helminthoglyptidae	3
0.081521	Carychium loheri	Carychiidae	1
0.0815272	Cerion pulla	Cerionidae	2
0.0815667	Helicodiscus salmonaceus	Helicodiscidae	12
0.0816884	Chloritis athrix	Camaenidae	1
0.0818053	Orthalicus pulchellus	Orthalicidae	19
0.0819599	Paraphaedusa dohertyi	Clausiliidae	1
0.0819743	Diplopoma lachneri	Annulariidae	2
0.0820935	Cyathopoma philippense	Cyclophoridae	1
0.0824274	Georissa maraoraoa	Hydrocenidae	1
0.0826669	Helminthoglypta micrometalleoides	Helminthoglyptidae	1
0.0828281	Sonorella bequaerti	Xanthonycidae	2
0.0829089	Epiphragmophora multesima	Epiphragmophoridae	1
0.0829802	Curvella cataractae	Subulinidae	1
0.0832291	Cyclotopsis raripilus	Pomatiidae	1
0.0832581	Albinaria contaminata	Clausiliidae	4
0.0832808	Paraegopis casius	Zonitidae	1
0.0833097	Omphalotropis major	Assimineidae	1
0.0833502	Curvella langi	Subulinidae	3
0.0834132	Diastole insculpta	Euconulidae	8
0.0836181	Laevoleacina solidula	Oleacinidae	52
0.0836214	Drymaeus inusitatus	Bulimulidae	3
0.0838865	Baccilum orthoceras	Subulinidae	2
0.0839499	Gulella ranomasina	Streptaxidae	1
0.0840242	Discus pauper	Discidae	27
0.0840414	Dentellaria tridentina	Pleurodontidae	30
0.0840881	Platyrhytida seisseti	Charopidae	3
0.0843356	Balambania cornu	Assimineidae	3
0.0843867	Euconulus yaeyamensis	Euconulidae	4
0.0844215	Antonella trochlearis	Achatinellidae	3
0.0844561	Cryptozona albata	Ariophantidae	1
0.0847468	Pleuropoma (Orobophana) juddii	Helicinidae	3
0.0848051	Hendersonia occulta	Helicinidae	41
0.0848861	Partula levistriata	Partulidae	1
0.084887	Canariella fortunata	Helicidae	4
0.0849024	Daedalochila chisosensis	Polygyridae	9
0.0850297	Columbinia epistomium	Clausiliidae	3
0.0850812	Subzebrinus varentzowi	Enidae	2
0.0851199	Bulgarica rugicollis	Clausiliidae	22
0.0851892	Chloritis multisetosa	Camaenidae	1
0.0853102	Euhadra latispira	Bradybaenidae	36
0.0856261	Phaedusa suturalis	Clausiliidae	4
0.085645	Cristilabrum simplex	Camaenidae	1
0.0857069	Piena (Hionella) rufobrunnea	Euconulidae	2
0.0857666	Microceramus sanctispiritensis	Urocoptidae	5
0.0857964	Therasia thaisa	Charopidae	2
0.0858559	Pulchriconus termitarum	Thysanophoridae	1
0.0858584	Epiglypta sophiae	Helicarionidae	9
0.0859982	Moellendorffia eastlakeana	Camaenidae	1
0.0861556	Leptachatina lepida	Amastridae	2
0.0862254	Plicaxis mirabilis	Subulinidae	1
0.0862293	Liocallonia saxosa	Urocoptidae	3
0.0862568	Lyropupa (Lyropupilla) mirabilis	Vertiginidae	9
0.0863297	Partulina (Partulinella) dolei	Achatinellidae	3
0.0863691	Ferussacia folliculus	Ferussaciidae	24
0.0864014	Pupina junghuhni	Pupinidae	2
0.0864261	Azeca peneckei	Cochlicopidae	1
0.086848	Piena (Nukupiena) inflata	Euconulidae	1
0.0868825	Satsuma auratibasis	Camaenidae	3
0.086894	Spirostemma princeps	Urocoptidae	4
0.086976	Theobaldius thwaitesi	Cyclophoridae	2
0.0870159	Helicigona (Campylaeopsis) moellendorffi	Helicidae	1
0.0871817	Sturanya interna	Helicinidae	1
0.0872512	Achatina (Leptocallista) grandidieriana	Achatinidae	2
0.0873012	Helicella fumetana	Hygromiidae	1
0.0873858	Succinea (Novisuccinea) unicolor	Succineidae	22
0.0874619	Mirus carius	Enidae	1
0.0876142	Pleuropoma (Aphanoconia) verecundum	Helicinidae	14
0.0876157	Trichochloritis nasuta	Camaenidae	1
0.0876227	Acrocoptis florenciana	Urocoptidae	4
0.0876723	Pseudonapaeus costatus	Enidae	1
0.0879085	Pachysphaera annulata	Bradybaenidae	13
0.0879551	Delima conspurcata	Clausiliidae	15
0.0879822	Laoma labyrinthica	Punctidae	2
0.088051	Triodopsis (Vagvolgyorbis) juxtidens	Polygyridae	168
0.0880539	Cerion inaguense	Cerionidae	1
0.0880604	Pseudosubulina texoloensis	Spiraxidae	1
0.0881628	Albinaria munda	Clausiliidae	1
0.0881639	Globotrochus onestera	Camaenidae	1
0.0881739	Archegocoptis barbouri	Urocoptidae	2
0.0882136	Megalophaedusa (Mundiphaedusa) micropeas	Clausiliidae	10
0.0882663	Pallifera wetherbyi	Philomycidae	1
0.0883011	Palaina (Palaina) alata	Diplommatinidae	7
0.0883019	Perrottetia compressus	Streptaxidae	1
0.0884977	Alinda (Pseudalinda) jugularis	Clausiliidae	2
0.0886596	Sonorella anchana	Xanthonycidae	3
0.08884	Rhiostoma hainesii	Cyclophoridae	1
0.0889074	Satsuma mercatoria	Camaenidae	53
0.0889114	Zonitoides nitidus	Gastrodontidae	127
0.0889445	Parvedentulina glessi	Streptaxidae	1
0.0889574	Albinaria clara	Clausiliidae	1
0.0891821	Gulella (Molarella) sylvia	Streptaxidae	1
0.0892482	Cerion thayeri	Cerionidae	2
0.0892558	Aegista tokyoensis	Bradybaenidae	3
0.0893522	Gulella fortidentata	Streptaxidae	2
0.0893799	Macrochlamys sogdiana	Ariophantidae	6
0.0894179	Drymaeus trigonostomus	Bulimulidae	26
0.0894931	Macroceramus torrei	Urocoptidae	2
0.0895448	Ostodes strigatus	Neocyclotidae	9
0.0896086	Xerocerastus ovulum	Subulinidae	1
0.0896108	Auriculella auricula	Achatinellidae	25
0.0896267	Stoastomops walkeri	Helicinidae	2
0.0896465	Retinella (Lyrodiscus) osoriensis	Godwiniidae	1
0.0897568	Fischerpietteus ambrensis	Streptaxidae	1
0.0897997	Phaedusa diplochilus	Clausiliidae	1
0.0898585	Ryssota uranus	Chronidae	3
0.0898932	Corasia saranganica	Bradybaenidae	1
0.0900382	Helicodiscus eigenmanni	Helicodiscidae	104
0.0900771	Stenotrema florida	Polygyridae	4
0.0902322	Tropidophora lienardi	Pomatiidae	1
0.0903401	Albinaria krueperi	Clausiliidae	5
0.0903971	Hiona (Insulorbis) monticola	Euconulidae	2
0.090454	Sinicola jugatoria	Plectopylidae	1
0.0906232	Eurytus cardinalis	Bulimulidae	3
0.0907812	Dilataria pulchella	Clausiliidae	2
0.0907899	Gonostomopsis auridens	Pleurodontidae	2
0.090848	Varicella dominicensis	Oleacinidae	3
0.0909469	Anixa pfeifferi	Bradybaenidae	2
0.0911575	Ramsdenia notata	Annulariidae	1
0.0911996	Leptopoma (Trocholeptopoma) goniostoma	Cyclophoridae	3
0.0912338	Asperitas kalaoensis	Ariophantidae	1
0.0912429	Cyclophorus (Litostylus) amoenus	Cyclophoridae	2
0.0912555	Hypnophila pupaeformis	Cochlicopidae	1
0.0915175	Videna splendidula	Trochomorphidae	2
0.0916087	Diplommatina pachycheilus	Diplommatinidae	1
0.0916118	Cerion flavida	Cerionidae	1
0.0916178	Mendana dentaxis	Euconulidae	1
0.091624	Alcadia (Penisoltia) foveata	Helicinidae	5
0.0916845	Microceramus floridanus	Urocoptidae	21
0.091711	Subulona amputata	Subulinidae	2
0.0918051	Colobostylus rosenbergianus	Annulariidae	23
0.0918702	Aperostoma quitense	Neocyclotidae	1
0.0920113	Orthalicus floridensis	Orthalicidae	41
0.0920173	Versutaxis alvarodoi	Spiraxidae	1
0.0920801	Chamalycaeus rathouisianus	Cyclophoridae	2
0.0920829	Stenogyra maxima	Subulinidae	18
0.092112	Boucardicus elegans	Cyclophoridae	3
0.0921749	Cerion josephinae	Cerionidae	3
0.0922147	Megalacron ambrosis	Camaenidae	11
0.0923561	Stoastomops puertoricana	Helicinidae	3
0.0924414	Planispira surrecta	Camaenidae	2
0.0925559	Bostryx (Platybostryx) reentsi	Bulimulidae	4
0.0927231	Rabdotus (Plicolumna) artemisia	Bulimulidae	3
0.092738	Gulella inhluzaniensis	Streptaxidae	1
0.0928064	Trochoidea despreauxi	Helicidae	4
0.0929264	Bostryx atacamensis	Bulimulidae	2
0.0929927	Tropidophora congener	Pomatiidae	1
0.0933083	Thysanota guerini	Charopidae	1
0.0933863	Helicina (Oxyrhombus) sprucei	Helicinidae	1
0.0934131	Cupedora rufofasciata	Camaenidae	2
0.0935389	Chondropomorus delatreanus	Annulariidae	4
0.0936371	Gastrocopta (Immersidens) iheringi	Vertiginidae	2
0.0936822	Pleuropoma (Aphanoconia) bourailense	Helicinidae	4
0.0938674	Cochlostyla leucophaea	Bradybaenidae	3
0.0938787	Microcystis subplanata	Euconulidae	1
0.0938924	Cerion anodonta	Cerionidae	3
0.0940194	Pleurodonte labeo	Pleurodontidae	2
0.0942021	Ampelita subfunebris	Acavidae	1
0.0942754	Cerion cyclura	Cerionidae	2
0.0943004	Amastra mucronata	Amastridae	12
0.0943557	Acrocoptis delectabilis	Urocoptidae	5
0.0944341	Chondropoma moestum	Annulariidae	10
0.0945877	Bulgarica fraudigera	Clausiliidae	2
0.0946803	Phaedusa tonkiniana	Clausiliidae	1
0.0947904	Asperitas baliensis	Ariophantidae	2
0.0949869	Cerion alba	Cerionidae	4
0.0949948	Partulina (Baldwinia) grisea	Achatinellidae	2
0.0950551	Cerion catherwoodianum	Cerionidae	1
0.095068	Columbinia gracilis	Clausiliidae	1
0.0950766	Ganesella apex	Camaenidae	1
0.0951052	Gongylostomella creola	Urocoptidae	8
0.0951094	Zaptyx idioptyx	Clausiliidae	2
0.0951325	Dupontia perlucida	Helicarionidae	1
0.0951462	Euhadra granulifera	Bradybaenidae	1
0.0951889	Planispira liedtkei	Camaenidae	1
0.0952761	Pupilla (Fragipupilla) alabiella	Pupillidae	1
0.0953219	Gulella beandreana	Streptaxidae	1
0.0953757	Daudebardia sicula	Daudebardiidae	2
0.0954505	Thaumastus monozonalis	Bulimulidae	1
0.0955259	Bermudezia euglypta	Annulariidae	1
0.0957389	Thapsia corusca	Urocyclidae	1
0.0957635	Vertigo alabamensis	Vertiginidae	2
0.0958089	Strobilops piratica	Strobilopsidae	2
0.0958181	Cyathopoma (Jerdonia) trochlea	Cyclophoridae	1
0.0959964	Huttonella diodon	Streptaxidae	1
0.095998	Nesodiscus huaheinensis	Endodontidae	10
0.0960121	Omphalotropis (Scalinella) moussoni	Assimineidae	1
0.0960197	Melaniella caymanbracensis	Oleacinidae	1
0.0960592	Holospira cochisei	Urocoptidae	7
0.096213	Gulella boucheti	Streptaxidae	1
0.0962315	Versutaxis rhoadsae	Spiraxidae	1
0.0962506	Fadyenia cumingiana	Helicinidae	25
0.0964333	Pseudomphalus fabrei	Rhytididae	1
0.0965887	Achatinella (Achatinellastrum) livida	Achatinellidae	56
0.0968106	Streptostyla (Chersomitra) meridana	Spiraxidae	1
0.0969863	Libera streptaxon	Endodontidae	2
0.0972013	Amastrella albocincta	Amastridae	2
0.0972181	Pleuropoma (Orobophana) rufescens	Helicinidae	3
0.0975339	Hemiphaedusa (Hemizaptyx) caloptyx	Clausiliidae	5
0.0977896	Berendtia taylori	Bulimulidae	8
0.0980299	Trishoplita okinoshimae	Bradybaenidae	4
0.0980499	Parvedentulina metula	Streptaxidae	1
0.0980574	Pagodulina lederi	Orculidae	2
0.0981825	Cerion tortuga	Cerionidae	2
0.0982202	Cyclophorus (Glossostylus) daranganicus	Cyclophoridae	10
0.0982783	Corona (Melaniorthalicus) approximata	Orthalicidae	1
0.0983848	Drymaeus ghiesbreghti	Bulimulidae	1
0.0983912	Chondrula (Mastus) gaillyi	Enidae	1
0.0984931	Partula coxi	Partulidae	4
0.0985372	Helicodiscus notius	Helicodiscidae	12
0.0986773	Trochozonites percarinatus	Urocyclidae	3
0.0990956	Systrophia (Systrophiella) eudiscus	Scolodontidae	2
0.0991989	Cochlostoma (Auritus) waldemari	Diplommatinidae	6
0.0993138	Cerion regia	Cerionidae	4
0.0994183	Spixia spixi	Bulimulidae	6
0.0996168	Tyrannophaedusa orthatracta	Clausiliidae	3
0.099692	Pacificella macgregori	Achatinellidae	3
0.0997196	Albinaria carpathia	Clausiliidae	1
0.0997292	Planispira zonaria	Camaenidae	8
0.0998147	Reinia (Proreinia) vaga	Clausiliidae	5
0.0998414	Ptychochloritis ceramensis	Camaenidae	1
0.0998646	Planamastra spaldingi	Amastridae	3
0.100141	Cochlostoma (Titanopoma) fuchsi	Diplommatinidae	1
0.100314	Chersaecia revoluta	Plectopylidae	1
0.100492	Limadora tollini	Annulariidae	6
0.100796	Streptartemon crossei	Streptaxidae	1
0.101096	Poecilozonites nelsoni	Gastrodontidae	26
0.10112	Letourneuxia moreleti	Arionidae	1
0.10119	Piena (Hiloaa) hiloi	Euconulidae	1
0.101255	Balambania pyramidata	Assimineidae	3
0.101421	Gracilinenia filocostulata	Clausiliidae	4
0.101442	Leptopoma (Trocholeptopoma) roepstorfianum	Cyclophoridae	1
0.101532	Aegista kandai	Bradybaenidae	1
0.101668	Medora eris	Clausiliidae	1
0.101718	Campylaea lefeburiana	Helicidae	8
0.101795	Andrefrancia gwendolinae	Charopidae	1
0.101808	Xerocrassa cretica	Helicidae	15
0.101823	Zilchiella grandiportus	Clausiliidae	2
0.10187	Stenotrema spinosum	Polygyridae	52
0.101875	Tomelasmus azucarensis	Urocoptidae	2
0.10196	Geomelania parvula	Truncatellidae	6
0.101973	Alcadia (Penisoltia) minuta	Helicinidae	1
0.102051	Bostryx peruvianus	Bulimulidae	3
0.102084	Opisthosiphon bahamense	Annulariidae	30
0.102108	Kalidos glessi	Ariophantidae	3
0.102166	Microceramus gossei	Urocoptidae	87
0.102209	Gonaxis maugerae	Streptaxidae	2
0.102237	Armiella knudseni	Amastridae	1
0.102347	Colobostylus nuttii	Annulariidae	6
0.102394	Pacificella hataiana	Achatinellidae	1
0.102438	Boucardicus pupisomus	Cyclophoridae	3
0.102566	Sericata bathyclista	Clausiliidae	2
0.102667	Ventridens coelaxis	Gastrodontidae	2
0.103008	Mirus clausiliformis	Enidae	1
0.103237	Albersia granulata	Camaenidae	1
0.103256	Euphaedusa bacillum	Clausiliidae	3
0.103293	Cochlostyla bicolorata	Bradybaenidae	7
0.103411	Neocepolis merarcha	Camaenidae	2
0.103427	Trochochlamys lioconus	Chronidae	4
0.10347	Cernuella hamilcaris	Hygromiidae	1
0.103475	Diplommatina (Pseudopalaina) crassilabris	Diplommatinidae	1
0.103538	Annularisca (Annularella) interstitialis	Annulariidae	5
0.103603	Cerion sueyrasi	Cerionidae	2
0.103656	Punctum planatum	Punctidae	1
0.103747	Phaedusa asaluensis	Clausiliidae	1
0.103758	Oreohelix peripherica	Oreohelicidae	69
0.103773	Dentellaria okeniana	Pleurodontidae	8
0.103823	Dendrotrochus pyxis	Helicarionidae	1
0.103862	Cerion crassalabra	Cerionidae	2
0.103924	Pupoides (Ischnopupoides) paredisii	Pupillidae	4
0.103927	Bourciera helicinaeformis	Helicinidae	9
0.10402	Helicina jamaicensis	Helicinidae	136
0.104041	Rhachidina mozambicensis	Enidae	1
0.104337	Plagioptycha sargenti	Helminthoglyptidae	2
0.104374	Metamastra transversalis	Amastridae	7
0.104394	Caseolus dealbatus	Helicidae	1
0.104424	Sheldonia (Kerkophorus) fusicolor	Urocyclidae	3
0.104446	Ramsdenia undosa	Annulariidae	2
0.104522	Xesta naninoides	Ariophantidae	1
0.104709	Liburnica setigera	Helicidae	1
0.104729	Dryptus funcki	Bulimulidae	4
0.104765	Endoplon philaria	Plectopylidae	1
0.104875	Megalobulimus separabilis	Megalobulimidae	10
0.104938	Boucardicus kylei	Cyclophoridae	4
0.105057	Helicostyla (Chromatosphaera) pudibunda	Bradybaenidae	1
0.105062	Eurytus apolinari	Bulimulidae	2
0.105225	Sonorella caerulifluminis	Xanthonycidae	20
0.105285	Amphidromus (Syndromus) sinistralis	Camaenidae	9
0.105373	Cerion vetusta	Cerionidae	2
0.105469	Monacha parreysi	Helicidae	4
0.105495	Helicostyla collodes	Bradybaenidae	9
0.105679	Diplommatina (Sinica) taiwanica	Diplommatinidae	5
0.105782	Afripupa farquhari	Vertiginidae	1
0.105916	Garrettia parva	Assimineidae	9
0.105932	Phenacolimax (Madeirovitrina) portosantanus	Vitrinidae	1
0.106006	Phenacolimax (Madeirovitrina) ruivensis	Vitrinidae	2
0.106112	Cyclophorus (Glossostylus) himalayanus	Cyclophoridae	1
0.106196	Adamsiellops ignilabris	Annulariidae	17
0.106268	Vertigo numelata	Vertiginidae	15
0.106338	Albinaria turrita	Clausiliidae	5
0.106417	Thapsia millestriata	Urocyclidae	1
0.106455	Tomocyclus simulacrum	Neocyclotidae	5
0.106477	Cyclophorus (Kobeltostylus) speciosus	Cyclophoridae	2
0.10653	Alopia pomatias	Clausiliidae	1
0.10654	Uncinicoptis unguiculata	Urocoptidae	2
0.106601	Georissa laevigata	Hydrocenidae	2
0.106754	Amastra violacea	Amastridae	14
0.106781	Orthalicus princeps	Orthalicidae	81
0.106788	Phaeohelix miyakejimana	Bradybaenidae	5
0.106808	Sonorella russelli	Xanthonycidae	1
0.107111	Canefriula lacteolata	Camaenidae	6
0.107126	Paravitrea blarina	Pristilomatidae	1
0.107218	Cerion dissimila	Cerionidae	1
0.107225	Cochlostyla ventricosus	Bradybaenidae	1
0.107416	Delima crenulata	Clausiliidae	3
0.107543	Videna sibuyanica	Trochomorphidae	2
0.107564	Idyla kephissiae	Clausiliidae	12
0.107696	Metamastra badia	Amastridae	5
0.10779	Chondrina (Granopupa) scalaris	Chondrinidae	6
0.107822	Alcadia (Idesa) concinna	Helicinidae	6
0.10787	Phortion scolopendra	Charopidae	1
0.107955	Subzebrinus sogdiana	Enidae	5
0.107958	Wilkinsonaea adamsiana	Helicinidae	11
0.108006	Corona (Melaniorthalicus) adamsoni	Orthalicidae	2
0.108024	Chondropometes saturatus	Annulariidae	1
0.108025	Karaftohelix blakeana	Bradybaenidae	21
0.108188	Drepanostomella ammoniformis	Scolodontidae	1
0.108331	Napaeus rupicola	Enidae	1
0.108357	Damochlora rectilabrum	Camaenidae	1
0.108513	Achatina welwitschi	Achatinidae	3
0.108568	Ostodes tiara	Neocyclotidae	2
0.10861	Rhiostoma morleti	Cyclophoridae	3
0.108688	Vespericola columbiana	Polygyridae	89
0.108762	Alycaeus (Dicharax) strangulatus	Cyclophoridae	1
0.108997	Lewisia philippiana	Helicinidae	1
0.109001	Cryptozona divisa	Ariophantidae	1
0.109101	Megalophaedusa (Mesophaedusa) validiuscula	Clausiliidae	6
0.109231	Obba papilla	Camaenidae	4
0.10934	Varicostele rutshuruensis	Streptaxidae	1
0.109387	Pupinella pupiniformis	Pupinidae	4
0.109595	Euplecta shiplayi	Ariophantidae	1
0.109625	Cyclophorus (Glossostylus) bensoni	Cyclophoridae	1
0.109632	Aguayotudora bermudezi	Annulariidae	1
0.109658	Tropidophora occlusa	Pomatiidae	3
0.109662	Pseudelma incisa	Streptaxidae	1
0.109689	Phaedusa broderseni	Clausiliidae	1
0.109775	Drymaeus (Mesembrinus) dominicus	Bulimulidae	40
0.109818	Helicella mexensis	Hygromiidae	1
0.110067	Megalacron novaegeorgiensis	Camaenidae	8
0.110139	Flammulina feredayi	Charopidae	1
0.110161	Subulona ischna	Subulinidae	5
0.110214	Chloraea bifasciata	Bradybaenidae	13
0.110382	Holospira anomala	Urocoptidae	1
0.110471	Scutalus revinctus	Bulimulidae	4
0.110512	Succinea archeyi	Succineidae	1
0.11052	Haploptychius costulatus	Streptaxidae	5
0.110557	Stenogyra swiftiana	Subulinidae	23
0.110587	Thapsia rutshuruensis	Urocyclidae	1
0.110606	Salasiella (Perpusilla) subcylindrica	Oleacinidae	1
0.110622	Labyrinthus triplicatus	Labyrinthidae	5
0.11085	Radiocentrum clappi	Oreohelicidae	19
0.110858	Centralia tuba	Urocoptidae	3
0.110923	Tornatellides kilauea	Achatinellidae	2
0.110951	Cyclotus lowianus	Cyclophoridae	3
0.111039	Helicina (Oxyrhombus) paraensis	Helicinidae	1
0.111088	Turrithyra discolorans	Annulariidae	2
0.111298	Apopitys andersonni	Achatinellidae	1
0.111387	Diplommatina rubella	Diplommatinidae	3
0.111408	Cerion salinaria	Cerionidae	2
0.111467	Amastra humilis	Amastridae	4
0.111517	Gulella marojejyae	Streptaxidae	1
0.111521	Brachypodella (Gyraxis) ramsdeni	Urocoptidae	2
0.111549	Drymaeus pergracilis	Bulimulidae	1
0.11163	Diplommatina (Diplommatina) angulata	Diplommatinidae	1
0.111786	Cepaea nemoralis	Helicidae	294
0.11185	Salasiella (Perpusilla) modesta	Oleacinidae	7
0.111977	Elasmias simplissimum	Achatinellidae	1
0.112076	Scutalus culmineus	Bulimulidae	6
0.112143	Trochoidea prietoi	Helicidae	1
0.112211	Tyrrhenaria tristis	Helicidae	7
0.112364	Bostryx andoicus	Bulimulidae	1
0.112373	Neniatlanta pauli	Clausiliidae	4
0.112494	Hygromia cinctella	Hygromiidae	20
0.112652	Leptaxis nivosa	Helicidae	20
0.112736	Anoma gossei	Urocoptidae	2
0.112743	Hadra forsteriana	Camaenidae	4
0.112761	Torrecoptis mercedesensis	Urocoptidae	7
0.112784	Halotudora trochlearis	Annulariidae	1
0.112786	Partula crassilabris	Partulidae	14
0.112833	Paravitrea grimmi	Pristilomatidae	1
0.11301	Cochlodryas fastidiosa	Bradybaenidae	1
0.113082	Xerarionta areolata	XantHonycidae	33
0.113114	Ventridens (Ventricallus) acerra	Gastrodontidae	73
0.113266	Amphidromus (Syndromus) furcillatus	Camaenidae	5
0.113318	Ponentina subvirescens	Hygromiidae	6
0.113325	Planispira halmaherica	Camaenidae	1
0.113387	Chondrula (Amphitrorsus) venerabilis	Enidae	5
0.113749	Monilearia pulverulenta	Cochlicellidae	1
0.113792	Drymaeus serratus	Bulimulidae	3
0.113855	Cathaica (Pliocathaica) pulveratrix	Bradybaenidae	1
0.113871	Vitrina latebasis	Vitrinidae	2
0.113907	Drymaeus sulphureus	Bulimulidae	23
0.113918	Amphidromus (Amphidromus) javanicus	Camaenidae	4
0.113959	Tetrentodon camoensis	Urocoptidae	4
0.114051	Amastra seminuda	Amastridae	1
0.114078	Rhytidopoma rugulosum	Annulariidae	10
0.114136	Brachypodella trinitaria	Urocoptidae	9
0.114252	Chondrothyrella perturbata	Annulariidae	1
0.114463	Hemiphaedusa tokunoshimana	Clausiliidae	3
0.114564	Sonorella apache	Xanthonycidae	7
0.114592	Candidula vulgarissima	Helicidae	3
0.114608	Crossopoma enganoense	Cyclophoridae	1
0.114611	Kalidos rufescens	Ariophantidae	8
0.114641	Realia auporia	Pupinidae	2
0.114725	Micrarionta guadalupiana	XantHonycidae	6
0.114761	Cecilioides retteri	Ferussaciidae	1
0.114798	Rhodea gigantea	Subulinidae	1
0.114824	Sterkia calamitosa	Vertiginidae	3
0.11485	Austrochloritis occulta	Camaenidae	1
0.114947	Coptocheilus perakensis	Pupinidae	1
0.115036	Abbottella sanchezi	Annulariidae	2
0.115116	Kalidos conorchidus	Ariophantidae	1
0.11522	Trochulus lubomirskii	Hygromiidae	4
0.11523	Eutudora inquisita	Annulariidae	2
0.115267	Cyclophorus volvulus	Cyclophoridae	1
0.115426	Bostryx (Geopyrgus) extensus	Bulimulidae	1
0.115436	Cochlicopa lubricella	Cochlicopidae	17
0.115524	Albinaria maculosa	Clausiliidae	6
0.115611	Rectoleacina episcopalis	Oleacinidae	3
0.115628	Janulus bifrons	Gastrodontidae	12
0.115724	Salasiella guadalajarensis	Oleacinidae	1
0.115826	Chondrula euboica	Enidae	3
0.116082	Succinea manaoensis	Succineidae	1
0.116199	Lucidella (Poenia) umbonata	Helicinidae	15
0.116324	Piena grandis	Euconulidae	6
0.116434	Helicigona subzonata	Helicidae	2
0.116481	Greggelix punctata	Xanthonycidae	1
0.116509	Systrophia (Systrophiella) alicea	Scolodontidae	1
0.116565	Miradiscops bregyi	Scolodontidae	1
0.11658	Deroceras semitectus	Limacidae	5
0.116588	Chersaecia leiophis	Plectopylidae	3
0.116671	Semilimax truncata	Vitrinidae	1
0.116882	Ptychopatula macneilli	Valloniidae	186
0.116977	Sallepoma ambiguum	Annulariidae	1
0.117096	Papillifera candidescens	Clausiliidae	16
0.117242	Ashmunella townsendi	Polygyridae	21
0.117456	Odontostomus odontostomus	Odontostomidae	4
0.117477	Pleuropoma theobaldianum	Helicinidae	1
0.117561	Antinous graniger	Helicarionidae	1
0.117582	Cyclotus hebraicus	Cyclophoridae	1
0.117621	Vertigo nylanderi	Vertiginidae	1
0.117735	Napaeus vulgaris	Enidae	5
0.117814	Eucalodium decollatum	Urocoptidae	4
0.117977	Euhadra yakushimana	Bradybaenidae	4
0.118057	Eurytus pentadinus	Bulimulidae	1
0.118141	Halotudora magnifica	Annulariidae	1
0.118163	Khasiella chloroplax	Ariophantidae	1
0.118174	Egestula pandora	Charopidae	1
0.11821	Monachoides rubiginosa	Hygromiidae	12
0.118262	Serrulina serrulata	Clausiliidae	8
0.118352	Ceratopoma primeanum	Helicinidae	1
0.118376	Euxina paulhessei	Clausiliidae	1
0.118486	Hemiplecta souleyetiana	Ariophantidae	1
0.118497	Leptopoma (Leptopoma) lowi	Cyclophoridae	1
0.118598	Gulella leucocion	Streptaxidae	1
0.118654	Linisa behrii	Polygyridae	20
0.118669	Omphalotropis huaheinensis	Assimineidae	6
0.11879	Succinea (Novisuccinea) grosvenori	Succineidae	77
0.11883	Kororia palaensis	Euconulidae	18
0.118922	Diplommatina (Sinica) planicollis	Diplommatinidae	1
0.118928	Bradybaena scalpturita	Bradybaenidae	2
0.119007	Cerion marmoratum	Cerionidae	16
0.119038	Labyrinthus aenigma	Labyrinthidae	1
0.119103	Boucardicus darasyi	Cyclophoridae	1
0.119153	Tropidophora macareae	Pomatiidae	4
0.119157	Amastrella fossilis	Amastridae	1
0.119159	Subulina glyptocephala	Subulinidae	1
0.119186	Ennea subflavescens	Streptaxidae	1
0.119196	Thapsia consobrina	Urocyclidae	1
0.11937	Gulella magnifica	Streptaxidae	1
0.119414	Sculptaria damarensis	Corillidae	1
0.119422	Geophorus rollei	Helicinidae	1
0.119567	Luchuphaedusa oshimae	Clausiliidae	2
0.119697	Ramsdenia torquata	Annulariidae	2
0.119741	Euphaedusa lorraini	Clausiliidae	4
0.119762	Cerion saxitina	Cerionidae	1
0.119854	Helenopupa turtoni	Vertiginidae	2
0.119883	Scolodonta suborbicula	Streptaxidae	2
0.119943	Rhagada torulus	Camaenidae	2
0.119976	Kaala subrutila	Euconulidae	5
0.12004	Metamastra subrostrata	Amastridae	8
0.120077	Tortulosa colletti	Pupinidae	2
0.120116	Georissa quadrasi	Hydrocenidae	3
0.120291	Philonesia (Aa) mapulehuae	Euconulidae	1
0.120402	Boysidia (Paraboysidia) kelantenensis	Hypselostomatidae	1
0.120449	Drepanostoma camerani	Helicidae	1
0.120561	Chamalycaeus miyazakii	Cyclophoridae	5
0.120663	Amphicosmia salleana	Urocoptidae	5
0.120708	Succinea quadrasi	Succineidae	3
0.120759	Diplommatina (Sinica) superba	Diplommatinidae	1
0.120782	Oxychilus (Eopolita) mingrelicus	Oxychilidae	1
0.120858	Delima (Semirugata) muralis	Clausiliidae	9
0.120923	Gulella instabilis	Streptaxidae	1
0.121078	Opeas pyrgula	Subulinidae	27
0.121216	Scabrina tonkiniana	Cyclophoridae	1
0.12127	Drymaeus regularis	Bulimulidae	1
0.121343	Acicula oeodogyra	Aciculidae	2
0.121663	Rhyssotopsis conferta	Ariophantidae	2
0.121738	Geomitra coronata	Helicidae	7
0.121771	Limicolaria pyrrha	Achatinidae	1
0.121891	Monacha gregaria	Helicidae	7
0.121895	Cochlostoma (Auritus) auritum	Diplommatinidae	5
0.121999	Allocharopa legrandi	Charopidae	1
0.122061	Haplotrema (Ancotrema) sportella	Haplotrematidae	71
0.122079	Endodonta binaria	Endodontidae	8
0.122096	Diplommatina roebeleni	Diplommatinidae	2
0.122179	Streptostyla turgidula	Spiraxidae	3
0.122295	Gongylostomella wrighti	Urocoptidae	3
0.1223	Thapsia castor	Urocyclidae	1
0.122369	Catinella (Mediappendix) texana	Succineidae	1
0.122372	Alycaeus (Alycaeus) fultoni	Cyclophoridae	2
0.122378	Placostylus (Placocharis) palmarum	Bulimulidae	8
0.122474	Albinaria compressa	Clausiliidae	3
0.122498	Aegista kobensis	Bradybaenidae	30
0.122545	Pilula praetumida	Charopidae	1
0.122694	Helicella eucallochroa	Hygromiidae	1
0.122768	Gastrocopta lienardiana	Vertiginidae	2
0.12283	Palaina (Palaina) australiae	Diplommatinidae	1
0.122906	Tyrannophaedusa aurantiaca	Clausiliidae	63
0.122969	Dialeuca subconica	Helminthoglyptidae	75
0.123063	Plectopylis gouldingi	Plectopylidae	2
0.123079	Retinella hiulca	Godwiniidae	8
0.123094	Rabdotus sonorensis	Bulimulidae	1
0.123139	Geomitra acarinata	Helicidae	1
0.123173	Eurybasis sylvanus	Trochomorphidae	2
0.123409	Trichodiscina hinkleyi	XantHonycidae	3
0.123449	Japonia (Lagocheilus) dido	Cyclophoridae	1
0.123571	Koratia distincta	Ariophantidae	8
0.123584	Succinea (Novisuccinea) pronophobus	Succineidae	4
0.123599	Thapsia egenula	Urocyclidae	1
0.123644	Andrefrancia calliope	Charopidae	5
0.123726	Neophaedusa masatokandai	Clausiliidae	2
0.123733	Cerion lenticularium	Cerionidae	1
0.123755	Ceratopoma (Palaeohelicina) suprafasciatum	Helicinidae	1
0.123948	Neohelix chadwicki	Polygyridae	1
0.124052	Amplirhagada napierana	Camaenidae	1
0.124219	Traumatophora triscalpta	Camaenidae	3
0.124232	Neopetraeus weyrauchi	Bulimulidae	2
0.124347	Paralaoma lateumbilicata	Punctidae	2
0.124419	Sphincterochila argia	Helicidae	10
0.124531	Cyclophorus (Glossostylus) pliciferus	Cyclophoridae	2
0.124565	Pleuropoma (Aphanoconia) knudseni	Helicinidae	2
0.124676	Labyrinthus dunkeri	Labyrinthidae	7
0.124773	Hemiphaedusa (Hemizaptyx) ikiensis	Clausiliidae	3
0.12483	Reinia (Proreinia) nakadai	Clausiliidae	5
0.124833	Japonia (Lagocheilus) mariei	Cyclophoridae	1
0.124983	Paraegopis corax	Zonitidae	2
0.125062	Pleuropoma (Aphanoconia) draytonense	Helicinidae	1
0.125161	Columbinia columbiana	Clausiliidae	1
0.125175	Ratnadvipia irradians	Ariophantidae	2
0.125232	Succinea cepulla	Succineidae	10
0.125241	Bulimulus unicolor	Bulimulidae	32
0.125253	Omphalotropis (Oriella) variabilis	Assimineidae	7
0.125315	Euconulus (Nesoconulus) gaetanoi	Euconulidae	2
0.125361	Sonorelix borregoensis	Helminthoglyptidae	10
0.125368	Diplommatina (Sinica) uozumii	Diplommatinidae	2
0.125369	Cyclophorus (Cyclophorus) friensianus	Cyclophoridae	1
0.12537	Delima (Semirugata) alschingeri	Clausiliidae	11
0.125397	Glessula textilis	Subulinidae	1
0.125413	Succinea exilis	Succineidae	2
0.12547	Bothriembryon fuscus	Bulimulidae	1
0.125523	Ennea commoda	Streptaxidae	1
0.125644	Succinea kuhnsi	Succineidae	4
0.125662	Trilamellaxis proteus	Urocoptidae	5
0.125665	Ashmunella mudgei	Polygyridae	2
0.125818	Discus randolphi	Discidae	1
0.125841	Discula cheiranticola	Helicidae	11
0.125877	Masculus santaritana	Xanthonycidae	16
0.12597	Helicostyla (Opalliostyla) modesta	Bradybaenidae	1
0.126002	Limicolaria droueti	Achatinidae	1
0.126172	Tropidophora unicarinata	Pomatiidae	52
0.126277	Amastra hitchcocki	Amastridae	2
0.126293	Drymaeus bogotensis	Bulimulidae	1
0.126308	Scutalus coraformis	Bulimulidae	1
0.126321	Scutalus (Xenothauma) broggii	Bulimulidae	1
0.12656	Helicella polymita	Hygromiidae	1
0.126583	Isabellaria clandestina	Clausiliidae	8
0.126648	Craticula ferraria	Pupillidae	3
0.126711	Cyclophorus (Cyclophorus) elegans	Cyclophoridae	2
0.12676	Paraparmarion imperator	Ariophantidae	2
0.126769	Geomelania hilliana	Truncatellidae	4
0.126899	Otala (Deserticola) alabastra	Helicidae	1
0.126989	Metafruticicola pellita	Hygromiidae	9
0.1271	Trichochloritis hemiopta	Camaenidae	1
0.12711	Trochomorpha (Cotitrochus) eurydice	Trochomorphidae	24
0.127238	Ferussacia (Pegea) terveri	Ferussaciidae	4
0.127288	Glyphyalinia (Glyphyalus) circumstriata	Godwiniidae	9
0.127315	Truncatella bairdiana	Truncatellidae	3
0.127328	Leptopoma (Trocholeptopoma) polyzonatum	Cyclophoridae	2
0.127357	Macroceramus pazi	Urocoptidae	12
0.127389	Tornatellaria henshawi	Achatinellidae	1
0.127423	Partula fusca	Partulidae	27
0.127563	Gulella crassidens	Streptaxidae	2
0.127573	Helicella aramonensis	Hygromiidae	1
0.127741	Alopia (Attica) guicciardii	Clausiliidae	2
0.127853	Helicobulinus sarcinosa	Bradybaenidae	14
0.128065	Tropidophora vitellina	Pomatiidae	1
0.128096	Megalophaedusa (Mundiphaedusa) heteroptyx	Clausiliidae	6
0.128218	Rhinus heterotrichus	Bulimulidae	6
0.128276	Ladronnellum mariannarum	Charopidae	2
0.128342	Kokotschashvilia phaeolaema	Helicidae	1
0.12847	Trishoplita eumenes	Bradybaenidae	24
0.128502	Varicella (Varicellina) vicina	Oleacinidae	29
0.12854	Sinoennea blanfordiana	Streptaxidae	2
0.12867	Lissembryon peasei	Pleurodontidae	2
0.128673	Hemicycla stulta	Helicidae	1
0.128856	Macrochlamys (Euaustenia) monticola	Ariophantidae	2
0.129004	Coptocheilus funiculatus	Pupinidae	2
0.129013	Oxychilus (Oxychilops) villae	Oxychilidae	6
0.12902	Leptopoma (Trocholeptopoma) subconicum	Cyclophoridae	1
0.129075	Partula pacifica	Partulidae	3
0.129172	Tropidophora chavani	Pomatiidae	3
0.129226	Liguus fasciatus	Orthalicidae	1410
0.129265	Oxychilus agostinhoi	Oxychilidae	1
0.129269	Succinea approximans	Succineidae	16
0.129456	Aguayotudora harpa	Annulariidae	1
0.129505	Salasiella (Perpusilla) corni	Oleacinidae	2
0.129575	Chiliborus goniostoma	Strophocheilidae	7
0.129711	Pupina atrata	Pupinidae	3
0.129715	Centralia torreana	Urocoptidae	2
0.129723	Helicina (Olygyra) arenicola	Helicinidae	16
0.12981	Hemicycla chersa	Helicidae	2
0.129876	Allodiscus dimorphus	Charopidae	4
0.129962	Synapterpes hanleyi	Subulinidae	4
0.130064	Partula lutea	Partulidae	13
0.130117	Taheitia arcasiana	Truncatellidae	1
0.130253	Leptachatina coruscans	Amastridae	15
0.130359	Succinea tahitensis	Succineidae	5
0.130363	Pupinella brazieri	Pupinidae	1
0.130412	Xerocrassa eremophila	Helicidae	3
0.130415	Jaminia microtragus	Enidae	21
0.130437	Achatina (Lissachatina) johnstoni	Achatinidae	4
0.130454	Delima sirkii	Clausiliidae	1
0.130569	Trochomorpha (Nigritella) crassicarinata	Trochomorphidae	4
0.130666	Otala (Deserticola) surrodonta	Helicidae	2
0.130743	Endoplon schlumbergeri	Plectopylidae	2
0.13092	Campylaea planospira	Helicidae	65
0.130951	Vertigo japonica	Vertiginidae	8
0.130992	Archachatina (Tholachatina) simplex	Achatinidae	4
0.13124	Helicarion rugosus	Helicarionidae	1
0.131256	Theba macandrewiana	Helicidae	5
0.13127	Achatinella (Achatinellastrum) phaeozona	Achatinellidae	12
0.131285	Bostryx subelatus	Bulimulidae	1
0.13131	Succinea pallida	Succineidae	3
0.131312	Eumecostylus cleryi	Bulimulidae	8
0.131331	Albinaria corrugata	Clausiliidae	12
0.131353	Priotrochatella torrei	Helicinidae	4
0.131387	Plebecula anaglyptica	Helicidae	1
0.131399	Rhinus velutinahispidus	Bulimulidae	1
0.131417	Cerion oberholseri	Cerionidae	2
0.131434	Cochlostoma (Obscurella) striolatum	Diplommatinidae	3
0.131451	Parasitala libertina	Euconulidae	3
0.131458	Georissa flavescens	Hydrocenidae	1
0.13147	Helicina (Oxyrhombus) weyrauchi	Helicinidae	3
0.131618	Trochoidea trochlea	Helicidae	6
0.131686	Leptopoma (Trocholeptopoma) acuminatum	Cyclophoridae	3
0.131696	Zaphysema tenerrimum	Sagdidae	179
0.131724	Eustomopsis fraterna	Camaenidae	1
0.131782	Lyropupa microthauma	Vertiginidae	5
0.131788	Succinea manuana	Succineidae	2
0.131815	Spirostemma mandevillense	Urocoptidae	3
0.131901	Opisthosiphon berryi	Annulariidae	6
0.131936	Paropeas acutissimum	Subulinidae	4
0.13206	Cochlostoma (Cochlostoma) mostarense	Diplommatinidae	1
0.132091	Cyclotus caroli	Cyclophoridae	9
0.132098	Viana regina	Helicinidae	137
0.132295	Rochebrunia clausa	Pomatiidae	1
0.132426	Cyathopoma (Nakadaella) micron	Cyclophoridae	21
0.132584	Partula labrusca	Partulidae	1
0.132816	Boucardicus manjakely	Cyclophoridae	1
0.132881	Chalepotaxis infantilis	Helicarionidae	2
0.132893	Linisa ventrosula	Polygyridae	5
0.132901	Vertigo californica	Vertiginidae	36
0.133018	Troschelviana (Microviana) pfeifferiana	Helicinidae	9
0.133106	Labyrinthus manueli	Labyrinthidae	3
0.133252	Helminthoglypta allynsmithi	Helminthoglyptidae	3
0.133256	Thaumastus melanocheilus	Bulimulidae	4
0.133338	Hemiphaedusa cecillii	Clausiliidae	8
0.133418	Callonia lowei	Urocoptidae	3
0.133467	Annularisca (Chondropomatus) mimeticus	Annulariidae	2
0.133539	Kalidos galokoae	Ariophantidae	1
0.133575	Helicella retowskii	Hygromiidae	1
0.133835	Zaphysema olivaceum	Sagdidae	43
0.133845	Helicostyla (Calocochlea) chrysochila	Bradybaenidae	1
0.133912	Megalacron coniformis	Camaenidae	1
0.134212	Salinator burmana	Amphibolidae	3
0.134306	Leptinaria filocostata	Subulinidae	2
0.134348	Hemicycla benthencourtiana	Helicidae	2
0.134354	Cerion carnale	Cerionidae	1
0.134376	Plekocheilus (Eudolichotis) perdix	Bulimulidae	3
0.134713	Chondrina spelta	Chondrinidae	11
0.135019	Simpulopsis tryoni	Amphibulimidae	2
0.135122	Serrulina sieversi	Clausiliidae	2
0.13528	Discula lyelliana	Helicidae	3
0.135373	Streptaxis comboides	Streptaxidae	1
0.135571	Boriquena playa	Oleacinidae	14
0.135617	Cerion dalli	Cerionidae	23
0.135669	Labyrinthus sieversi	Labyrinthidae	2
0.135673	Wilkinsonaea schomburghkiana	Helicinidae	6
0.135686	Meridolum jervisensis	Camaenidae	7
0.135713	Bostryx angiportus	Bulimulidae	2
0.135732	Cathaica graeseri	Bradybaenidae	1
0.135809	Alycaeus (Dicharax) expatriatus	Cyclophoridae	1
0.135991	Herpeteros inglesiana	Helminthoglyptidae	1
0.135992	Macroceramus signatus	Urocoptidae	18
0.136026	Succinea apicalis	Succineidae	1
0.136236	Velifera gabbi	Euconulidae	1
0.136418	Succinea baldwini	Succineidae	3
0.136439	Kaliella gudei	Helicarionidae	6
0.136508	Mesodon sanus	Polygyridae	1
0.136616	Subzebrinus erratica	Enidae	2
0.13668	Cochlicella barbara	Cochlicellidae	82
0.136783	Cerion maritimum	Cerionidae	25
0.136814	Mautodontha punctiperforata	Endodontidae	2
0.13686	Cyclophorus (Cyclophorus) floridus	Cyclophoridae	4
0.136874	Helicopsis guimeti	Hygromiidae	1
0.136885	Ouagapia ratusukuni	Rhytididae	1
0.136925	Euconulus sappho	Euconulidae	1
0.136938	Palaua minor	Euconulidae	4
0.137004	Systrophia (Entodina) heligmoida	Scolodontidae	9
0.137093	Obba lasallii	Camaenidae	1
0.1371	Vertigo elatior	Vertiginidae	20
0.137131	Endodonta lamellosa	Endodontidae	10
0.137141	Amphidromus (Amphidromus) ventrosulus	Camaenidae	1
0.137143	Alcadia (Palliata) microstoma	Helicinidae	5
0.137256	Gulella orchida	Streptaxidae	1
0.137496	Gulella (Tortigulella) cara	Streptaxidae	1
0.137511	Cristataria genezarethana	Clausiliidae	2
0.137556	Omphalotropis pupoides	Assimineidae	1
0.137837	Achatinella (Achatinellastrum) spaldingi	Achatinellidae	1
0.137852	Euxina hetaera	Clausiliidae	1
0.1379	Oxychilus alliarius	Oxychilidae	36
0.137946	Vallonia tenuilabris	Valloniidae	4
0.138145	Delima pfeifferi	Clausiliidae	8
0.138208	Libera tumuloides	Endodontidae	4
0.138271	Oxychilus (Helicophana) aegopinoides	Oxychilidae	1
0.138484	Limicolariopsis ruwenzoriensis	Achatinidae	1
0.138559	Euhadra nachicola	Bradybaenidae	2
0.138672	Isabellaria syracusana	Clausiliidae	12
0.138686	Stoastoma pfeifferianum	Helicinidae	14
0.138737	Helix (Codringtonia) oetae	Helicidae	4
0.138876	Paramastra tenuispira	Amastridae	2
0.138937	Succinea margarita	Succineidae	10
0.139047	Gassiesia guestierianus	Neocyclotidae	4
0.139167	Alcadia (Hjalmarsona) neebiana	Helicinidae	6
0.139192	Bekkochlamys danjoensis	Euconulidae	1
0.139397	Anisospira orcutti	Urocoptidae	4
0.139612	Pupina pfeifferi	Pupinidae	3
0.139654	Helicostyla (Calocochlea) matruelis	Bradybaenidae	3
0.139725	Succinea planti	Succineidae	2
0.139813	Cochlicella terveriana	Cochlicellidae	2
0.139905	Alinda (Pseudalinda) fallax	Clausiliidae	14
0.139935	Cerion klineae	Cerionidae	1
0.139979	Eostrobilops hirasei	Strobilopsidae	4
0.140037	Dilataria marcki	Clausiliidae	3
0.140115	Truncatella obscura	Truncatellidae	1
0.140196	Odontosagda suprema	Sagdidae	1
0.140265	Pythia chalcostoma	Ellobiidae	3
0.140414	Leptopoma (Leptopoma) papuanum	Cyclophoridae	1
0.140436	Setipellis stigmatica	Helminthoglyptidae	10
0.140455	Cerion santamariae	Cerionidae	1
0.140455	Hyalosagda similis	Sagdidae	99
0.140465	Opisthosiphon simpsoni	Annulariidae	4
0.140496	Balambania (Pseudocyclotus) levis	Assimineidae	2
0.140518	Monacha cantiana	Helicidae	36
0.140564	Subulona lucasi	Subulinidae	2
0.140715	Tetrentodon barroi	Urocoptidae	3
0.140716	Pyramidula hierosolymitana	Pyramidulidae	6
0.140724	Kempioconcha retirugis	Subulinidae	2
0.140861	Cyathopoma prestoni	Cyclophoridae	1
0.140968	Mirus tonkiniana	Enidae	1
0.140978	Gulella opoboensis	Streptaxidae	2
0.141086	Eurytus superstriatus	Bulimulidae	7
0.141147	Anoma solida	Urocoptidae	15
0.141179	Kaliella barrakporensis	Helicarionidae	4
0.141321	Conibycus higashiyamana	Euconulidae	1
0.141349	Xesta porcellanica	Ariophantidae	2
0.141362	Trukcharopa trukana	Charopidae	3
0.141543	Geophorus sundanus	Helicinidae	4
0.14159	Poecilozonites cupuloides	Gastrodontidae	1
0.141591	Discula discina	Helicidae	20
0.141617	Aegista platyomphala	Bradybaenidae	2
0.141773	Anoma striata	Urocoptidae	12
0.142012	Bostryx (Lissoacme) bilineatus	Bulimulidae	3
0.142136	Gonaxis percivali	Streptaxidae	2
0.142179	Ptychotrema bequaerti	Streptaxidae	1
0.142379	Strobilus dacryma	Achatinellidae	1
0.142387	Nesopupa morini	Vertiginidae	1
0.142449	Taheitia heinrichi	Truncatellidae	2
0.142489	Galadistes liverpoolensis	Camaenidae	2
0.142499	Bradybaena controversa	Bradybaenidae	2
0.142526	Craticula millegrana	Pupillidae	8
0.14261	Ferussacia amblya	Ferussaciidae	1
0.142697	Synapterpes coronatus	Subulinidae	1
0.142708	Phortion menkeana	Charopidae	2
0.142887	Pleuropoma (Aphanoconia) noumeense	Helicinidae	3
0.142893	Trichochloritis propinqua	Camaenidae	4
0.14294	Cerion cylindriata	Cerionidae	1
0.142941	Cerion sarcostomum	Cerionidae	1
0.142965	Subzebrinus candelaris	Enidae	4
0.14306	Fernandezia cylindrella	Achatinellidae	1
0.143112	Edentiella leucozona	Hygromiidae	21
0.143387	Heteramastra laeva	Amastridae	1
0.143414	Dendrotrochus cleryi	Helicarionidae	23
0.143617	Colonina bryanti	Annulariidae	2
0.143847	Tetrentodon grillensis	Urocoptidae	3
0.143913	Helix (Isaurica) lycica	Helicidae	1
0.143972	Chondropomella magnifica	Annulariidae	1
0.144033	Cerion palidula	Cerionidae	3
0.144067	Helicigona (Cingulifera) cingulatum	Helicidae	56
0.144254	Macrochlamys superlita	Ariophantidae	2
0.144283	Cochlostoma (Auritus) klecaki	Diplommatinidae	2
0.144286	Discus rotundatus	Discidae	98
0.144287	Cryptozona chrysorhaphe	Ariophantidae	1
0.144363	Limax (Limacus) flavus	Limacidae	4
0.144366	Helicomela punctulatus	Hygromiidae	9
0.144389	Boucardicus claudei	Cyclophoridae	8
0.144434	Helicina (Olygyra) cacaguelita	Helicinidae	3
0.144494	Cochlodina incisa	Clausiliidae	5
0.144606	Ampelita subsepulchralis	Acavidae	4
0.14467	Cathaica siningfuensis	Bradybaenidae	1
0.14467	Discus ruderatus	Discidae	24
0.144774	Limicolaria turriformis	Achatinidae	3
0.14482	Cerion comes	Cerionidae	4
0.14483	Pachysphaera sphaerica	Bradybaenidae	7
0.144899	Cyclojamaicia suturalis	Neocyclotidae	29
0.144985	Hemitrochus milleri	Helminthoglyptidae	6
0.145121	Palaina (Cylindropalaina) trachelostropha	Diplommatinidae	2
0.145169	Thaanumella carolinarum	Assimineidae	2
0.145172	Chondropoma blauneri	Annulariidae	3
0.145178	Hiona (Minororbis) cultrata	Euconulidae	1
0.145225	Paramastus episoma	Enidae	5
0.145316	Oxytesta cycloplax	Ariophantidae	2
0.14536	Cyclophorus (Kobeltostylus) saturnus	Cyclophoridae	2
0.145837	Boucardicus ambanianae	Cyclophoridae	1
0.145961	Ganesella saurivonga	Camaenidae	2
0.145971	Macrochlamys cincta	Ariophantidae	2
0.14608	Mesanella trailli	Bradybaenidae	5
0.146154	Blaesospira echinus	Annulariidae	7
0.146216	Gonaxis cressyi	Streptaxidae	1
0.146378	Camaena fruhstorferi	Camaenidae	1
0.146401	Trochozonites ibuensis	Urocyclidae	1
0.146419	Glessula lankana	Subulinidae	2
0.146534	Edentulina insignis	Streptaxidae	2
0.146687	Mirus rugulosus	Enidae	2
0.146706	Eurytus aureonitens	Bulimulidae	3
0.146769	Neophaedusa spelaeonis	Clausiliidae	2
0.146793	Euconulus velatus	Euconulidae	1
0.146828	Naesiotus (Granitza) elaeodes	Bulimulidae	1
0.146939	Columella simplex	Vertiginidae	9
0.147101	Geostilbia moellendorffi	Ferussaciidae	1
0.147158	Trachycystis connollyi	Charopidae	1
0.147181	Cyathopoma diegoense	Cyclophoridae	1
0.147182	Thapsia renitens	Urocyclidae	2
0.147242	Cupedora patruelis	Camaenidae	2
0.147402	Tetrentodon palmeri	Urocoptidae	1
0.14747	Hispidella horripila	Hygromiidae	2
0.147473	Zachrysia gundlachiana	Pleurodontidae	1
0.147619	Cyclophorus (Kobeltostylus) arthriticus	Cyclophoridae	3
0.147622	Japonia (Lagocheilus) marangensis	Cyclophoridae	1
0.147639	Acrophaedusa thrausta	Clausiliidae	1
0.147938	Pleuropoma (Aphanoconia) caledonicum	Helicinidae	1
0.147984	Balambania (Pseudocyclotus) laeta	Assimineidae	1
0.148049	Microcystina shevaroyana	Ariophantidae	2
0.14805	Lucidella (Poenia) lineata	Helicinidae	23
0.148133	Trochomorpha (Lauhala) corallina	Trochomorphidae	3
0.148287	Philonesia (Aa) gouveiana	Euconulidae	2
0.14832	Micrarionta intermedia	XantHonycidae	6
0.148371	Opisthostoma (Plectostoma) busanense	Diplommatinidae	1
0.148372	Fadyenia alderiana	Helicinidae	4
0.148399	Cochlostoma (Auritus) villae	Diplommatinidae	1
0.14851	Tropidophora sublirata	Pomatiidae	1
0.148621	Euglandina cucutensis	Oleacinidae	1
0.14864	Thapsia geoffreyi	Urocyclidae	1
0.148749	Westraltrachia froggatti	Camaenidae	1
0.148776	Diplopoma storchi	Annulariidae	2
0.148966	Gulella (Molarella) metula	Streptaxidae	2
0.149021	Colobostylus jayanus	Annulariidae	36
0.149204	Thaumastus (Scholvienia) weyrauchi	Bulimulidae	4
0.149389	Chondrocyclus exsertus	Cyclophoridae	1
0.149621	Neocyclotus (Incidostoma) kobelti	Neocyclotidae	1
0.149727	Sarika hainesi	Ariophantidae	1
0.149876	Subzebrinus herzensteini	Enidae	1
0.149991	Drymaeus serperastrus	Bulimulidae	1
0.150052	Euplecta rathouisii	Ariophantidae	2
0.150102	Anoma pulchella	Urocoptidae	2
0.150164	Rabdotus (Leptobyrsus) slevini	Bulimulidae	1
0.150235	Bahiensis bahiensis	Odontostomidae	6
0.150402	Helminthoglypta crotallina	Helminthoglyptidae	3
0.150447	Omphalina zonites	Godwiniidae	4
0.150453	Cyclotus (Procyclotus) campanulatus	Cyclophoridae	27
0.150495	Opisthosiphon protractum	Annulariidae	3
0.150498	Helicostyla (Opalliostyla) straminea	Bradybaenidae	1
0.150624	Hedleyella macconelli	Caryodidae	2
0.150697	Candidula subapicina	Helicidae	2
0.150731	Aspastus (Callistocharis) subrugosus	Bulimulidae	1
0.15086	Allopeas hamonvillei	Subulinidae	1
0.151007	Rachis pallens	Enidae	1
0.151009	Placostylus fulgineus	Bulimulidae	8
0.151014	Subzebrinus otostomus	Enidae	1
0.151089	Lucerna lamarckii	Pleurodontidae	33
0.151115	Mirinaba unidentatus	Strophocheilidae	2
0.151155	Cochlodinella mediana	Urocoptidae	2
0.151158	Geomelania striosa	Truncatellidae	13
0.151211	Eremarionta orocopia	Helminthoglyptidae	4
0.151293	Sonorella verdensis	Xanthonycidae	7
0.15133	Mychostoma album	Urocoptidae	113
0.151531	Laevoleacina poeyana	Oleacinidae	2
0.151555	Bostryx (Lissoacme) apodometes	Bulimulidae	4
0.151571	Cochlostoma (Cochlostoma) compactum	Diplommatinidae	1
0.151584	Dyakia martini	Ariophantidae	3
0.151599	Janulus stephanophora	Gastrodontidae	5
0.151609	Helminthoglypta torreonica	Helminthoglyptidae	1
0.151679	Tomelasmus assimilis	Urocoptidae	2
0.151723	Acicula beneckei	Aciculidae	3
0.151799	Tetrentodon alleni	Urocoptidae	5
0.151818	Ganesella capitum	Camaenidae	1
0.151861	Suavitas suavis	Sagdidae	9
0.151903	Corona pfeifferi	Orthalicidae	1
0.151918	Fusulus interruptus	Clausiliidae	3
0.151957	Lindholmiella aciculata	Clausiliidae	2
0.152241	Japonia (Lagocheilus) raripilum	Cyclophoridae	1
[truncated: 11,158 more rows]
